# Supplementary material
Source: PubMed Central journal article supplement (PMC2803247)

## Supplemental Material

### Improved method for the quantification of lysophospholipids including enol ether species by liquid chromatography-tandem mass spectrometry

James G. Bollinger<sup>\*</sup>, Hiromi Ii<sup>\*</sup>, Martin Sadilek<sup>\*</sup> and Michael H. Gelb<sup>\*§ 1</sup>

Departments of <sup>\*</sup>Chemistry and <sup>§</sup>Biochemistry, University of Washington, Seattle, WA  
98195 USA

<sup>1</sup>To whom correspondence should be addressed. email: [gelb@chem.washington.edu](mailto:gelb@chem.washington.edu)

**Supplemental Material Table 1. Autosampler and ESI-MSMS data collection parameters.**

|                                         |                      |                      |
|-----------------------------------------|----------------------|----------------------|
| Injection type                          | Sequential           |                      |
| Fill mode                               | Partial loop         |                      |
| Pre-sample airy boundary                | 2 $\mu$ L            |                      |
| Post-sample air boundary                | 2 $\mu$ L            |                      |
| Post-injection wash frequency           | 10 cycles            |                      |
| Flush time                              | 6 sec                |                      |
| Wash time                               | 15 sec               |                      |
| Secondary wash volume                   | 600 $\mu$ L          |                      |
|                                         | <b>Negative Mode</b> | <b>Positive Mode</b> |
| Capillary Voltage (kV)                  | 2.8                  | 3.0                  |
| Extractor (V)                           | 3                    | 3                    |
| RF Offset                               | 0.3                  | 0.3                  |
| Dwell Time (msec) <sup>1</sup>          | 40                   | 100                  |
| Inter-Scan Delay (msec) <sup>1</sup>    | 10                   | 10                   |
| Inter-Channel Delay (msec) <sup>1</sup> | 100                  | 100                  |
| Source Temp ( $^{\circ}$ C)             | 130                  | 130                  |
| Desolvation Temp ( $^{\circ}$ C)        | 450                  | 450                  |
| Desolvation Gas (L/Hr)                  | 1100                 | 1100                 |
| Cone Gas (L/Hr)                         | 50                   | 50                   |
| Collision Cell Entrance (V)             | -1                   | -1                   |
| Collision Cell Exit (V)                 | 1                    | 1                    |

<sup>1</sup>Each channel consists of all lysophospholipid species with a given polar head group (i.e. all LPG species constitute 1 channel, all LPI species constitute a second channel etc.). Data collection was carried out by cycling through the set of 89 ion reactions (negative mode). The instrument was switched to positive mode at 27.75 min post injection, and a set of 27 ion reactions were monitored. In each cycle, each ion reaction was monitored for 40 msec (Dwell Time) with a 10 msec period between each reaction monitoring in which no data was collected (Inter-Scan Delay, to allow for instrument parameter changes). After collecting data for the set of ion reactions in each lysophospholipid class, there was a 100 msec period in which no data was collected (Inter-Channel Delay).

**Supplemental Material Table 2. Extraction yields, liquid chromatography retention times, and tandem mass spectrometry parameters for lysophospholipid molecular species.**

| Lysophospholipid <sup>1</sup>       | Extr. yield (%) <sup>2</sup> | LC ret. time (min) | Limit of quant. (fmole) <sup>3</sup> | Parent ion <sup>4</sup> ( <i>m/z</i> ) | Fragment ion <sup>4</sup> ( <i>m/z</i> ) | Cone voltage <sup>5</sup> (V) | Collision energy <sup>5</sup> (eV) |
|-------------------------------------|------------------------------|--------------------|--------------------------------------|----------------------------------------|------------------------------------------|-------------------------------|------------------------------------|
| 12:0-LPG                            |                              | 9.8                |                                      | -427.22                                | -199.22                                  | -38                           | 26                                 |
| 14:0-LPG                            | 65                           | 9.5                | 80                                   | -455.25                                | -227.25                                  | -38                           | 26                                 |
| 16:1-LPG                            |                              | 9.3                |                                      | -481.26                                | -253.26                                  | -38                           | 26                                 |
| 16:0-LPG                            | 93                           | 9.2                | 120                                  | -483.28                                | -255.28                                  | -38                           | 26                                 |
| d <sub>31</sub> -16:0-LPG Int. Std. |                              | 9.2                |                                      | -514.44                                | -286.44                                  | -38                           | 26                                 |
| 18:3-LPG                            |                              | 9.2                |                                      | -505.25                                | -277.25                                  | -38                           | 26                                 |
| 18:2-LPG                            |                              | 9.1                |                                      | -507.27                                | -279.27                                  | -38                           | 26                                 |
| 18:1-LPG                            |                              | 9                  |                                      | -509.29                                | -281.29                                  | -38                           | 26                                 |
| 18:0-LPG                            | 106                          | 8.9                | 200                                  | -511.31                                | -283.31                                  | -38                           | 26                                 |
| 20:4-LPG                            |                              | 9.1                |                                      | -531.25                                | -303.25                                  | -38                           | 26                                 |
| 20:3-LPG                            |                              | 9                  |                                      | -533.27                                | -305.27                                  | -38                           | 26                                 |
| 20:2-LPG                            |                              | 8.8                |                                      | -535.29                                | -307.29                                  | -38                           | 26                                 |
| 20:1-LPG                            |                              | 8.7                |                                      | -537.31                                | -309.31                                  | -38                           | 26                                 |
| 20:0-LPG                            |                              | 8.7                |                                      | -539.33                                | -311.33                                  | -38                           | 26                                 |
| 22:6-LPG                            |                              | 9                  |                                      | -555.24                                | -327.24                                  | -38                           | 26                                 |
| 22:5-LPG                            |                              | 8.9                |                                      | -557.26                                | -329.26                                  | -38                           | 26                                 |
| 22:4-LPG                            |                              | 8.8                |                                      | -559.28                                | -331.28                                  | -38                           | 26                                 |
| 12:0-LPI                            |                              | 13.9               |                                      | -515.2                                 | -199.22                                  | -45                           | 35                                 |
| 14:0-LPI                            |                              | 13.5               |                                      | -543.23                                | -227.25                                  | -45                           | 35                                 |
| 16:1-LPI                            |                              | 13.1               |                                      | -569.26                                | -253.26                                  | -45                           | 35                                 |
| 16:0-LPI                            | 55                           | 12.9               | 65                                   | -571.28                                | -255.28                                  | -45                           | 35                                 |
| d <sub>31</sub> -16:0-LPI Int. Std. |                              | 12.9               |                                      | -602.44                                | -286.44                                  | -45                           | 35                                 |
| 18:3-LPI                            |                              | 13                 |                                      | -593.25                                | -277.25                                  | -45                           | 35                                 |
| 18:2-LPI                            |                              | 12.8               |                                      | -595.27                                | -279.27                                  | -45                           | 35                                 |
| 18:1-LPI                            | 72                           | 12.6               | 120                                  | -597.29                                | -281.29                                  | -45                           | 35                                 |
| 18:0-LPI                            | 71                           | 12.4               | 25                                   | -599.31                                | -283.31                                  | -45                           | 35                                 |
| 20:4-LPI                            |                              | 12.3               |                                      | -619.26                                | -303.25                                  | -45                           | 35                                 |
| 20:3-LPI                            |                              | 12.2               |                                      | -621.28                                | -305.27                                  | -45                           | 35                                 |
| 20:2-LPI                            |                              | 11.9               |                                      | -623.3                                 | -307.29                                  | -45                           | 35                                 |
| 20:1-LPI                            |                              | 11.9               |                                      | -625.32                                | -309.31                                  | -45                           | 35                                 |
| 20:0-LPI                            |                              | 11.7               |                                      | -627.34                                | -311.33                                  | -45                           | 35                                 |
| 22:6-LPI                            |                              | 12.3               |                                      | -643.25                                | -327.24                                  | -45                           | 35                                 |
| 22:5-LPI                            |                              | 12.2               |                                      | -645.27                                | -329.26                                  | -45                           | 35                                 |
| 22:4-LPI                            |                              | 12                 |                                      | -647.29                                | -331.28                                  | -45                           | 35                                 |
| 12:0-LPE                            |                              | 15.6               |                                      | -396.23                                | -199.22                                  | -32                           | 23                                 |
| 14:0-LPE                            | 94                           | 15.2               | 40                                   | -424.26                                | -227.25                                  | -32                           | 23                                 |
| 16:1-LPE                            |                              | 14.9               | 60                                   | -450.27                                | -253.26                                  | -32                           | 23                                 |
| 16:0-LPE                            | 95                           | 14.7               | 60                                   | -452.29                                | -255.28                                  | -32                           | 23                                 |
| d <sub>31</sub> -16:0-LPE Int. Std. |                              | 14.7               |                                      | -483.44                                | -286.44                                  | -32                           | 23                                 |
| 18:3-LPE                            |                              | 14.6               |                                      | -474.26                                | -277.25                                  | -32                           | 23                                 |
| 18:2-LPE                            |                              | 14.4               |                                      | -476.28                                | -279.27                                  | -32                           | 23                                 |
| 18:1-LPE                            | 80                           | 14.3               |                                      | -478.3                                 | -281.29                                  | -32                           | 23                                 |
| 18:0-LPE                            | 85                           | 14                 | 50                                   | -480.32                                | -283.31                                  | -32                           | 23                                 |
| 20:4-LPE                            |                              | 13.6               |                                      | -500.27                                | -303.25                                  | -32                           | 23                                 |
| 20:3-LPE                            |                              | 13.6               |                                      | -502.29                                | -305.27                                  | -32                           | 23                                 |
| 20:2-LPE                            |                              | 13.9               |                                      | -504.31                                | -307.29                                  | -32                           | 23                                 |
| 20:1-LPE                            |                              | 13.7               |                                      | -506.33                                | -309.31                                  | -32                           | 23                                 |

|                                     |     |      |     |         |         |     |    |
|-------------------------------------|-----|------|-----|---------|---------|-----|----|
| 20:0-LPE                            |     | 13.5 |     | -508.35 | -311.33 | -32 | 23 |
| 22:6-LPE                            |     | 13.6 |     | -524.26 | -327.24 | -32 | 23 |
| 22:5-LPE                            |     | 13.4 |     | -526.28 | -329.26 | -32 | 23 |
| 22:4-LPE                            |     | 13.2 |     | -528.3  | -331.28 | -32 | 23 |
| 12:0-LPS                            |     | 17.4 |     | -440.2  | -153.05 | -28 | 30 |
| 14:0-LPS                            |     | 17.2 |     | -468.23 | -153.05 | -28 | 30 |
| 16:1-LPS                            |     | 16.6 |     | -494.26 | -153.05 | -28 | 30 |
| 16:0-LPS                            | 67  | 16.3 |     | -496.28 | -153.05 | -28 | 30 |
| d <sub>31</sub> -16:0-LPS Int. Std. |     | 16.3 |     | -527.44 | -153.05 | -28 | 30 |
| 18:3-LPS                            |     | 16.3 |     | -518.25 | -153.05 | -28 | 30 |
| 18:2-LPS                            |     | 16.1 |     | -520.27 | -153.05 | -28 | 30 |
| 18:1-LPS                            | 77  | 15.9 |     | -522.29 | -153.05 | -28 | 30 |
| 18:0-LPS                            |     | 15.6 | 180 | -524.31 | -153.05 | -28 | 30 |
| 20:4-LPS                            | 82  | 15.9 |     | -544.26 | -153.05 | -28 | 30 |
| 20:3-LPS                            | 83  | 15.7 |     | -546.28 | -153.05 | -28 | 30 |
| 20:2-LPS                            | 98  | 15.7 |     | -548.3  | -153.05 | -28 | 30 |
| 20:1-LPS                            |     | 16.2 |     | -550.32 | -153.05 | -28 | 30 |
| 20:0-LPS                            |     | 15.6 |     | -552.34 | -153.05 | -28 | 30 |
| 22:6-LPS                            |     | 15.8 |     | -568.25 | -153.05 | -28 | 30 |
| 22:5-LPS                            |     | 15.6 |     | -570.27 | -153.05 | -28 | 30 |
| 22:4-LPS                            |     | 15.4 |     | -572.29 | -153.05 | -28 | 30 |
| 12:0-LPA                            |     | 22.8 |     | -353.22 | -153.05 | -28 | 20 |
| 14:0-LPA                            | 96  | 22.2 | 300 | -381.25 | -153.05 | -28 | 20 |
| 16:1-LPA                            |     | 22   |     | -407.26 | -153.05 | -28 | 20 |
| 16:0-LPA                            |     | 21.6 |     | -409.28 | -153.05 | -28 | 20 |
| d <sub>31</sub> -16:0-LPA Int. Std. |     | 21.6 |     | -440.44 | -153.05 | -28 | 20 |
| 18:3-LPA                            |     | 21.9 |     | -431.25 | -153.05 | -28 | 20 |
| 18:2-LPA                            |     | 21.6 |     | -433.27 | -153.05 | -28 | 20 |
| 18:1-LPA                            |     | 21.2 | 250 | -435.29 | -153.05 | -28 | 20 |
| 18:0-LPA                            |     | 20.9 |     | -437.31 | -153.05 | -28 | 20 |
| 20:4-LPA                            |     | 21.2 |     | -457.26 | -153.05 | -28 | 20 |
| 20:3-LPA                            |     | 21.2 |     | -459.28 | -153.05 | -28 | 20 |
| 20:2-LPA                            |     | 21   |     | -461.3  | -153.05 | -28 | 20 |
| 20:1-LPA                            |     | 20.5 |     | -463.32 | -153.05 | -28 | 20 |
| 20:0-LPA                            |     | 20.2 |     | -465.34 | -153.05 | -28 | 20 |
| 22:6-LPA                            |     | 21.2 |     | -481.25 | -153.05 | -28 | 20 |
| 22:5-LPA                            |     | 21.2 |     | -483.27 | -153.05 | -28 | 20 |
| 22:4-LPA                            |     | 20.9 |     | -485.29 | -153.05 | -28 | 20 |
| 12:0-LPC                            | 137 | 37.5 | 20  | +440.27 | +184.15 | +35 | 30 |
| 14:0-LPC                            | 109 | 35.8 |     | +468.30 | +184.15 | +35 | 30 |
| 16:1-LPC                            | 105 | 35.1 |     | +494.31 | +184.15 | +35 | 30 |
| 16:0-LPC                            | 98  | 34.4 | 20  | +496.33 | +184.15 | +35 | 30 |
| d <sub>31</sub> -16:0-LPC Int. Std. |     | 34.4 |     | +527.49 | +184.15 | +35 | 30 |
| 18:3-LPC                            |     | 34.8 |     | +518.30 | +184.15 | +35 | 30 |
| 18:2-LPC                            |     | 34.4 |     | +520.32 | +184.15 | +35 | 30 |
| 18:1-LPC                            | 106 | 33.8 |     | +522.34 | +184.15 | +35 | 30 |
| 18:0-LPC                            | 102 | 33   | 14  | +524.36 | +184.15 | +35 | 30 |
| 20:4-LPC                            |     | 33   |     | +544.32 | +184.15 | +35 | 30 |
| 20:3-LPC                            |     | 33.4 |     | +546.33 | +184.15 | +35 | 30 |
| 20:2-LPC                            | 87  | 32.9 |     | +548.35 | +184.15 | +35 | 30 |
| 20:1-LPC                            | 91  | 32.4 |     | +550.37 | +184.15 | +35 | 30 |
| 20:0-LPC                            | 107 | 31.6 |     | +552.39 | +184.15 | +35 | 30 |

|                                |     |       |      |         |         |     |    |
|--------------------------------|-----|-------|------|---------|---------|-----|----|
| 22:6-LPC                       |     | 33.7  |      | +568.34 | +184.15 | +35 | 30 |
| 22:5-LPC                       |     | 332.7 |      | +570.36 | +184.15 | +35 | 30 |
| 22:4-LPC                       |     | 31.7  |      | +572.38 | +184.15 | +35 | 30 |
| 24:0-LPC                       | 89  | 29.3  |      | +608.45 | +184.15 |     |    |
| 16:1-enyl-LPE                  |     | 13.2  | 1200 | -436.21 | -196.12 | -52 | 29 |
| 18:2-enyl-LPE                  | 89  | 12.9  |      | -462.22 | -196.12 | -52 | 29 |
| 18:1-enyl-LPE                  | 84  | 12.6  | 1400 | -464.24 | -196.12 | -52 | 29 |
| 16:1-enyl-LPC                  |     | 32.2  |      | +480.30 | +181.12 | +45 | 31 |
| 18:2-enyl-LPC                  | 105 | 32    |      | +506.31 | +181.12 | +45 | 31 |
| 18:1-enyl-LPC                  |     | 30.8  |      | +508.33 | +181.12 | +45 | 31 |
| 16:0-alkyl-LPC                 | 68  | 34.0  |      | +482.38 | +184.15 | +37 | 30 |
| d <sub>4</sub> -16:0-alkyl-LPC |     | 34.0  |      | +486.41 | +184.15 | +37 | 30 |
| 18:1-alkyl-LPC                 |     | 33.4  |      | +508.40 | +184.15 | +37 | 30 |
| 18:0-alkyl-LPC                 |     | 33.7  |      | +510.41 | +184.15 | +37 | 30 |

<sup>1</sup>The internal standard used for enol ether LPE and LPC species are d<sub>31</sub>-16:0-LPE and d<sub>31</sub>-16:0-LPC, respectively (see Main Text). Other internal standards are as indicated.

<sup>2</sup>Extraction yields were determined only for a subset of lysophospholipids as indicated.

<sup>3</sup>Limit of quantification is defined as a signal-to-noise ratio of ~10/1, as measured with the Waters QuanLynx software. Values are given only for those lysophospholipid species which were prepared as standardized stock solutions.

<sup>4</sup>*m/z* Values listed were derived from instrument tuning using a set of commercially available lysophospholipid standards (see Main Text for the list). Values for other species were obtained by subtracting or adding the appropriate exact atomic masses. Exact *m/z* values will vary in an instrument-dependent manner.

<sup>5</sup>Cone voltages and collision energies were optimized for each commercially available lysophospholipid (see Main Text for the list). We used the same values across the set of molecular species in each lysophospholipid head group class. Values were derived from instrument tuning and are instrument dependent.

## Analysis of isobars.

To look for isobaric species, we considered the masses of a general set of lysophospholipids that contain either a fatty acyl *sn*-1 chain or an ether linked *sn*-1 chain (both enol ether and alkyl ether). Polar head groups included were phosphate, phosphocholine, phosphoethanolamine, phosphoglycerol, phosphoinositol, and phosphoserine. We considered acyl and alkyl *sn*-1 chains 12:0, 14:0, 16:0,  $d_{31}$ -16:0, 16:1, 18:0, 18:1, 18:2, 18:3, 20:0, 20:1, 20:2, 20:3, 20:4, 22:4, 22:5, and 22:6. As a first step, we ignored isobars due to different positions of the double bonds in the fatty chain. We considered all lysophospholipids that are analyzed in negative mode (LPA, LPE, LPG, LPI, and LPS) as one group, and positive mode analytes (LPC) as a second group. Isobars between these two groups are not considered to cause an issue because of the different charge polarity used to analyze ions in negative mode and in positive mode and because it is highly likely that the LC step will lead to separation of all LPC species from all other lysophospholipid species (the group of LPC species are well separated from the group of LPA species). For each of the above lysophospholipids we also analyzed the ion mass + 1 since natural heavy isotopic substitution results in a satellite peak whose intensity is about 30% of the monoisotopic peak (lacking heavy isotopes). We also considered the ion mass -1, -2, and +2 to account for the isotope distribution for the  $d_{31}$ -16:0 internal standard for each head group. Thus, the number of negative mode masses considered is 360 (17 fatty chains x 5 polar head groups = 85 *sn*-1-acyl lysophospholipids plus 16 fatty chains (all but  $d_{31}$ -16:0) x 5 polar head groups = 80 *sn*-1-ether lysophospholipids gives 165 species, which gives 330 species after consideration of the ion mass + 1 ions). We also considered 6 lysophospholipids with the *sn*-1 fatty acyl chains 17:0 and 17:1 since these are commonly used commercially available internal standards (17:1-LPG, 17:1-LPI, 19:2-enyl-LPE, 17:1-LPE, 17:1-LPS, 17:0-LPA). As a second independent analysis, we considered 74 positive mode masses (all of negative mode masses plus 24:0). Thus, we considered a total of 440 lysophospholipid masses. Supplemental Material Table 3 list all isobars derived from the set of 360 masses for negative mode lysophospholipids (LPA, LPE, LPG, LPI, and LPS).

### Supplemental Material Table 3. Isobar analysis of LPA, LPE, LPG, LPI and LPS species.<sup>1</sup>

The table is organized as follows. The first column gives the mass at which isobaric lysophospholipid species exists. For all lysophospholipids except the perdeuterated species we considered its parent ion mass as well as the carbon-13 satellite (M+1). For the  $d_{31}$ -internal standards we considered the parent ion mass ( $d_{31}$ ) and the partially deuterated species ( $d_{30}$  and  $d_{29}$ ) as well as the carbon-13 satellite (M+1) and the additional species M+2. For example, when the [M-1] mass equals the isobaric mass, this lysophospholipid species appears in column 3.

The "e" in e12:0-LPE designates an *sn*-1 ether linked fatty chain, which includes alkyl and enol ethers. We use a single designation for ethers since this table does not make a distinction between double bond regioisomers. For example, e18:1-LPC could have an enol ether or an alkyl chain with the double bond more distant from the ether oxygen.

In the “Resolution of Isobars” column, “chromatography” means that the isobars are likely to be resolved by LC. “Q3” means that they are likely to be resolved by MSMS (vs MS). “calculation” means that the peak area for the putative analyte peak is significantly larger than the area calculated for the isobaric internal standard-derived peak where the latter is obtained by knowing the area of the  $d_{31}$  internal standard peak and the relative amounts of partially deuterated internal standard species. “Unresolved” means isobaric resolution cannot be made based on observations made in this study. “?” means no definitive statement about isobaric resolution can be made.

In the “Comments on Resolution” column, “likely” means the resolution of isobar statement is based on experimental trends seen with related lysophospholipid species, “experimental” means that isobaric resolution is based on experimental observations made in this study. Isobaric overlaps that are difficult to resolve are flagged in red, all others are in green.

Analysis of LPC isobars shows that aside from double bond regioisomers, there are no isobars as long as  $d_{31}$ -16:0-LPC and  $d_4$ -alkyl-16:0-LPC are used as internal standards. If LPC species with odd carbon number fatty acyl chains are used, isobars between multiple LPC species exist. This is of course true for any particular head group; the isobars listed in Supplemental Table 3 are between two lysophospholipids that have different polar head groups. As already noted, all LPC species elute well after the region of LPA elution, and other head group species elute earlier than LPA species. As described in the Main Text, when one of the double bonds is part of an enol ether, it is possible to distinguish the species from a double bond regioisomer isobar which does not contain an enol ether.

| Isobaric Mass [M-2] | Isobars [M-1]                | Isobars | Parent Ion Isobars                             | [M+1] Isobars                                      | [M+2] Isobars | Resolution of Isobars                              | Comments on Resolution           |
|---------------------|------------------------------|---------|------------------------------------------------|----------------------------------------------------|---------------|----------------------------------------------------|----------------------------------|
| 382                 |                              |         | e12:0-LPE                                      | 14:0-LPA                                           |               | Chromatography                                     | Likely                           |
| 396                 |                              |         | 12:0-LPE                                       | e16:0-LPA                                          |               | Chromatography                                     | Likely                           |
| 410                 |                              |         | e14:0-LPE                                      | 16:0-LPA                                           |               | Chromatography                                     | Likely                           |
| 423                 |                              |         | e18:0-LPA, 17:0-LPA                            |                                                    |               | Unresolved                                         |                                  |
| 424                 |                              |         | 14:0-LPE<br>14:0-LPE                           | e18:0-LPA<br>17:0-LPA<br>e18:0-LPA, 17:0-LPA       |               | Chromatography<br>Chromatography<br>Unresolved     | Likely<br>Likely                 |
| 427                 |                              |         | 12:0-LPG                                       | e12:0-LPS                                          |               | Chromatography                                     | Likely                           |
| 436                 |                              |         | e16:1-LPE                                      | 18:1-LPA                                           |               | Chromatography                                     | Likely                           |
| 437                 |                              |         | 18:0-LPA                                       | e16:1-LPE                                          |               | Chromatography                                     | Experimental                     |
| 438                 | d31-16:0-LPA<br>d31-16:0-LPA |         | e16:0-LPE<br>e16:0-LPE                         | 18:0-LPA<br>18:0-LPA                               |               | Chromatography<br>calculation<br>Chromatography    | Likely<br>Experimental<br>Likely |
| 439                 | d31-16:0-LPA                 |         |                                                | e16:0-LPE                                          |               | Chromatography                                     | Likely                           |
| 440                 |                              |         | d31-16:0-LPA, 12:0-LPS                         |                                                    |               | Chromatography                                     | Likely                           |
| 441                 |                              |         | e14:0-LPG<br>e14:0-LPG                         | d31-16:0-LPA<br>12:0-LPS<br>d31-16:0-LPA, 12:0-LPS |               | Chromatography<br>Chromatography<br>Chromatography | Likely<br>Likely<br>Likely       |
| 442                 |                              |         |                                                | e14:0-LPG                                          | d31-16:0-LPA  | Chromatography                                     | Likely                           |
| 450                 |                              |         | 16:1-LPE                                       | e20:1-LPA                                          |               | Q3/Chromatography                                  | Likely                           |
| 451                 |                              |         | e20:0-LPA                                      | 16:1-LPE                                           |               | Chromatography                                     | Likely                           |
| 452                 |                              |         | 16:0-LPE                                       | e20:0-LPA                                          |               | Chromatography                                     | Likely                           |
| 455                 |                              |         | 14:0-LPG                                       | e14:0-LPS                                          |               | Chromatography                                     | Likely                           |
| 460                 |                              |         | e18:3-LPG                                      | 20:3-LPA                                           |               | Chromatography                                     | Likely                           |
| 461                 |                              |         | 20:2-LPA                                       | e18:3-LPE                                          |               | Chromatography                                     | Likely                           |
| 462                 |                              |         | e18:2-LPE                                      | 20:2-LPA                                           |               | Chromatography                                     | Likely                           |
| 463                 |                              |         | 20:1-LPA                                       | e18:2-LPE                                          |               | Chromatography                                     | Likely                           |
| 464                 |                              |         | e18:1-LPE                                      | 20:1-LPA                                           |               | Chromatography                                     | Likely                           |
| 465                 |                              |         | 20:0-LPA                                       | e18:1-LPE                                          |               | Chromatography                                     | Likely                           |
| 466                 |                              |         | e18:0-LPE                                      | 20:0-LPA                                           |               | Chromatography                                     | Likely                           |
| 467                 |                              |         | e22:6-LPA, e16:1-LPG<br>e22:6-LPA<br>e16:1-LPG | e18:0-LPE<br>e18:0-LPE                             |               | Chromatography<br>Chromatography<br>Chromatography | Likely<br>Likely<br>Likely       |
| 468                 |                              |         | 14:0-LPS<br>14:0-LPS                           | e16:1-LPG<br>e22:6-LPA<br>e22:6-LPA, e16:1-LPG     |               | Chromatography<br>Chromatography<br>Chromatography | Likely<br>Likely<br>Likely       |
| 469                 |                              |         | e22:5-LPA, e16:0-LPG<br>e22:5-LPA<br>e16:0-LPG | 14:0-LPS<br>14:0-LPS                               |               | Chromatography<br>Chromatography<br>Chromatography | Likely<br>Likely<br>Likely       |
| 470                 |                              |         |                                                | e16:0-LPG, e22:5-LPA                               |               | Chromatography                                     | Likely                           |
| 476                 |                              |         | 18:2-LPE, e19:2-LPE                            |                                                    |               | Unresolved                                         | Experimental                     |
| 477                 |                              |         |                                                | 18:2-LPE, e19:2-LPE                                |               | Unresolved                                         | Experimental                     |
| 480                 |                              |         | e16:1-LPS, 18:0-LPE                            |                                                    |               | Chromatography                                     | Likely                           |



|     |              |                        |                        |                   |              |
|-----|--------------|------------------------|------------------------|-------------------|--------------|
| 481 |              | 22:6-LPA, 16:1-LPG     |                        | Chromatography    | Likely       |
|     |              | 22:6-LPA               | e16:1-LPS              | Chromatography    | Likely       |
|     |              | 22:6-LPA               | 18:0-LPE               | Chromatography    | Experimental |
|     |              | 16:1-LPG               | e16:1-LPS              | Chromatography    | Likely       |
|     |              | 16:1-LPG               | 18:0-LPE               | Q3/Chromatography | Experimental |
|     | d31-16:0-LPE |                        | Chromatography         | Likely            |              |
|     | d31-16:0-LPE | 22:6-LPA               |                        | Chromatography    | Likely       |
|     | d31-16:0-LPE | 16:1-LPG               |                        | Chromatography    | Likely       |
|     | d31-16:0-LPE |                        | e16:1-LPS              | Chromatography    | Likely       |
|     | d31-16:0-LPE |                        | 18:0-LPE               | calculation       | Likely       |
| 482 |              | e16:0-LPS              | 22:6-LPA               | Chromatography    | Likely       |
|     |              | e16:0-LPS              | 16:1-LPG               | Chromatography    | Likely       |
|     |              |                        | 22:6-LPA, 16:1-LPG     | Chromatography    | Likely       |
|     | d31-16:0-LPE | e16:0-LPS              |                        | Chromatography    | Likely       |
|     | d31-16:0-LPE |                        | 22:6-LPA               | Q3/Chromatography | Likely       |
|     | d31-16:0-LPE |                        | 16:1-LPG               |                   | Likely       |
| 483 |              | 22:5-LPA, d31-16:0-LPE |                        | Chromatography    | Experimental |
|     |              | 22:5-LPA, 16:0-LPG     |                        | Chromatography    | Likely       |
|     |              | 16:0-LPG, d31-16:0-LPE |                        | Q3/Chromatography | Likely       |
| 484 |              |                        | 22:5-LPA, d31 16:0-LPE | Chromatography    | Likely       |
|     |              |                        | 16:0-LPG, d31 16:0-LPE | Q3/Chromatography | Likely       |
|     |              |                        | 22:5-LPA, 16:0-LPG     | Chromatography    | Likely       |
| 486 |              | e20:4-LPE              | 22:4-LPA               | Chromatography    | Likely       |
| 491 |              | e18:3-LPG              | e20:2-LPE              | Chromatography    | Likely       |
| 492 |              | e20:1-LPE              | e18:3-LPG              | Chromatography    | Likely       |
| 493 |              | e18:2-LPG              | e20:1-LPE              | Chromatography    | Likely       |
| 494 |              | 16:1-LPS, e20:0-LPE    |                        | Chromatography    | Likely       |
|     |              | 16:1-LPS               | e18:2-LPG              | Chromatography    | Likely       |
|     |              | e20:0-LPE              | e18:2-LPG              | Chromatography    | Likely       |
| 495 |              | e18:1-LPG, 17:1-LPG    |                        | Unresolved        |              |
|     |              | e18:1-LPG              | 16:1-LPS               | Chromatography    | Likely       |
|     |              | e18:1-LPG              | e20:0-LPE              | Chromatography    | Likely       |
|     |              | 17:1-LPG               | 16:1-LPS               | Chromatography    | Likely       |
|     |              | 17:1-LPG               | e20:0-LPE              | Chromatography    | Likely       |
|     |              | 16:1-LPS, e20:0-LPE    | Chromatography         | Likely            |              |
| 496 |              | 16:0-LPS               | e18:1-LPG              | Chromatography    | Likely       |
|     |              | 16:0-LPS               | 17:1-LPG               | Chromatography    | Experimental |
|     |              |                        | e18:1-LPG, 17:1-LPG    | Unresolved        |              |
| 497 |              | e18:0-LPG              | 16:0-LPS               | Chromatography    | Likely       |
| 501 |              | e12:0-LPI              | 20:4-LPE               | Chromatography    | Likely       |
| 502 |              | 20:3-LPE               | e12:0-LPI              | Chromatography    | Likely       |
| 504 |              | e18:3-LPS, 20:2-LPE    |                        | Chromatography    | Likely       |
| 505 |              | 18:3-LPG               | e18:3-LPS              | Chromatography    | Likely       |
|     |              | 18:3-LPG               | 20:2-LPE               | Q3/Chromatography | Experimental |
|     |              |                        | e18:3-LPS, 20:2-LPE    | Chromatography    | Likely       |
| 506 |              | e18:2-LPS, 20:1-LPE    |                        | Chromatography    | Likely       |
|     |              | e18:2-LPS              | 18:3-LPG               | Chromatography    | Likely       |
|     |              | 20:1-LPE               | 18:3-LPG               | Q3/Chromatography | Experimental |
| 507 |              | 18:2-LPG               | e18:2-LPS              | Chromatography    | Likely       |
|     |              | 18:2-LPG               | 20:1-LPE               | Q3/Chromatography | Experimental |
|     |              |                        | e18:2-LPS, 20:1-LPE    | Chromatography    | Likely       |
| 508 |              | e18:1-LPS, 20:0-LPE    |                        | Chromatography    | Likely       |
|     |              | e18:1-LPS, 17:1-LPS    |                        | Unresolved        |              |
|     |              | 20:0-LPE, 17:1-LPS     |                        | Chromatography    | Likely       |
|     |              | e18:1-LPS              | 18:2-LPG               | Chromatography    | Likely       |
|     |              | 20:0-LPE               | 18:2-LPG               | Q3/Chromatography | Experimental |
|     |              | 17:1-LPS               | 18:2-LPG               | Chromatography    | Likely       |

|     |                                                  |                                                |                                                                                                       |                              |                                                                                                       |                                                                            |
|-----|--------------------------------------------------|------------------------------------------------|-------------------------------------------------------------------------------------------------------|------------------------------|-------------------------------------------------------------------------------------------------------|----------------------------------------------------------------------------|
| 509 |                                                  | 18:1-LPG<br>18:1-LPG<br>18:1-LPG               | e18:1-LPS<br>20:0-LPE<br>17:1-LPS<br>17:1-LPS, e18:1-LPS<br>17:1-LPS, 20:0-LPE<br>e18:1-LPS, 20:0-LPE |                              | Q3/Chromatography<br>Chromatography<br>Unresolved<br>Chromatography<br>Chromatography                 | Likely<br>Experimental<br>Experimental<br>Likely<br>Likely                 |
| 510 |                                                  | e18:0-LPS, e22:6-LPE<br>e18:0-LPS<br>e22:6-LPE | 18:1-LPG<br>18:1-LPG                                                                                  |                              | Chromatography<br>Chromatography<br>Q3/Chromatography                                                 | Likely<br>Likely<br>Likely                                                 |
| 511 |                                                  | 18:0-LPG<br>18:0-LPG                           | e18:0-LPS<br>e22:6-LPE<br>e18:0-LPS, e22:6-LPE                                                        |                              | Chromatography<br>Chromatography<br>Chromatography                                                    | Likely<br>Likely<br>Likely                                                 |
| 512 | d31-16:0-LPG<br>d31-16:0-LPG                     | e22:5-LPE<br>e22:5-LPE                         | 18:0-LPG<br>18:0-LPG                                                                                  |                              | Chromatography<br>Chromatography<br>calculation                                                       | Likely<br>Likely<br>Likely                                                 |
| 513 | d31-16:0-LPG                                     |                                                | e22:5-LPE                                                                                             |                              | Chromatography                                                                                        | Likely                                                                     |
| 514 |                                                  | d31-16:0-LPG, e22:4-LPE                        |                                                                                                       |                              | Chromatography                                                                                        | Likely                                                                     |
| 515 |                                                  | 12:0-LPI<br>12:0-LPI                           | d31-16:0-LPG<br>e22:4-LPE<br>d31-16:0-LPG, e22:4-LPE                                                  |                              | Q3/Chromatography<br>Q3<br>Q3/Chromatography                                                          | Likely<br>Likely<br>Likely                                                 |
| 516 |                                                  |                                                | 12:0-LPI                                                                                              | d31-16:0-LPG                 | Q3/Chromatography                                                                                     | Likely                                                                     |
| 518 |                                                  | 18:3-LPS                                       | e20:4-LPG                                                                                             |                              | Chromatography                                                                                        | Likely                                                                     |
| 519 |                                                  | e20:3-LPG                                      | 18:3-LPS                                                                                              |                              | Chromatography                                                                                        | Likely                                                                     |
| 520 |                                                  | 18:2-LPS                                       | e20:3-LPG                                                                                             |                              | Chromatography                                                                                        | Likely                                                                     |
| 521 |                                                  | e20:2-LPG                                      | 18:2-LPS                                                                                              |                              | Chromatography                                                                                        | Likely                                                                     |
| 522 |                                                  | 18:1-LPS                                       | e20:2-LPG                                                                                             |                              | Chromatography                                                                                        | Likely                                                                     |
| 523 |                                                  | e20:1-LPG                                      | 18:1-LPS                                                                                              |                              | Chromatography                                                                                        | Likely                                                                     |
| 524 |                                                  | 18:0-LPS, 22:6-LPE<br>18:0-LPS<br>22:6-LPE     | e20:1-LPG<br>e20:1-LPG                                                                                |                              | Chromatography<br>Chromatography<br>Chromatography                                                    | Experimental<br>Likely<br>Likely                                           |
| 525 | d31-16:0-LPS<br><br>d31-16:0-LPS<br>d31-16:0-LPS | e20:0-LPG<br>e20:0-LPG<br>e20:0-LPG            | 18:0-LPS<br>22:6-LPE<br><br>18:0-LPS, 22:6-LPE<br>18:0-LPS<br>22:6-LPE                                |                              | Chromatography<br>Chromatography<br>Chromatography<br>Chromatography<br>calculation<br>Chromatography | Likely<br>Likely<br>Likely<br>Experimental<br>Experimental<br>Experimental |
| 526 | d31-16:0-LPS<br>d31-16:0-LPS                     | 22:5-LPE<br>22:5-LPE                           | e20:0-LPG<br>e20:0-LPG                                                                                |                              | Chromatography<br>Chromatography<br>Chromatography                                                    | Likely<br>Experimental<br>Likely                                           |
| 527 |                                                  | d31-16:0-LPS                                   | 22:5-LPE                                                                                              |                              | Chromatography                                                                                        | Experimental                                                               |
| 528 |                                                  | 22:4-LPE                                       | d31-16:0-LPS                                                                                          |                              | Chromatography                                                                                        | Experimental                                                               |
| 529 |                                                  | e14:0-LPI<br>e14:0-LPI                         | 22:4-LPE<br>22:4-LPE                                                                                  | d31-16:0-LPS<br>d31-16:0-LPS | Chromatography<br>Chromatography<br>Chromatography                                                    | Likely<br>Likely<br>Experimental                                           |
| 530 |                                                  | e20:4-LPS                                      | e14:0-LPI                                                                                             |                              | Chromatography                                                                                        | Likely                                                                     |
| 531 |                                                  | 20:4-LPG                                       | e20:4-LPS                                                                                             |                              | Chromatography                                                                                        | Likely                                                                     |
| 532 |                                                  | e20:3-LPS                                      | 20:4-LPG                                                                                              |                              | Chromatography                                                                                        | Likely                                                                     |
| 533 |                                                  | 20:3-LPG                                       | e20:3-LPS                                                                                             |                              | Chromatography                                                                                        | Likely                                                                     |
| 534 |                                                  | e20:2-LPS                                      | 20:3-LPG                                                                                              |                              | Chromatography                                                                                        | Likely                                                                     |
| 535 |                                                  | 20:2-LPG                                       | e20:2-LPS                                                                                             |                              | Chromatography                                                                                        | Likely                                                                     |
| 536 |                                                  | e20:1-LPS                                      | 20:2-LPG                                                                                              |                              | Chromatography                                                                                        | Likely                                                                     |
| 537 |                                                  | 20:1-LPG                                       | e20:1-LPS                                                                                             |                              | Chromatography                                                                                        | Likely                                                                     |
| 538 |                                                  | e20:0-LPS                                      | 20:1-LPG                                                                                              |                              | Chromatography                                                                                        | Likely                                                                     |
| 539 |                                                  | 20:0-LPG                                       | e20:0-LPS                                                                                             |                              | Chromatography                                                                                        | Likely                                                                     |
| 543 |                                                  | e22:5-LPG, 14:0-LPI                            |                                                                                                       |                              | Chromatography, Q3                                                                                    | Likely                                                                     |

|     |                                              |                                              |                                                       |                            |
|-----|----------------------------------------------|----------------------------------------------|-------------------------------------------------------|----------------------------|
| 544 | 20:4-LPS<br>20:4-LPS                         | e22:5-LPG<br>14:0-LPI<br>e22:5-LPG, 14:0-LPI | Chromatography<br>Chromatography<br>Chromatography,Q3 | Likely<br>Likely<br>Likely |
| 545 |                                              | e22:4-LPG<br>20:4-LPS                        | Chromatography                                        | Likely                     |
| 546 |                                              | 20:3-LPS<br>e22:4-LPG                        | Chromatography                                        | Likely                     |
| 555 | 22:6-LPG, e16:1-LPI<br>22:6-LPG<br>e16:1-LPI | e22:6-LPS<br>e22:6-LPS                       | Chromatography,Q3<br>Chromatography<br>Chromatography | Likely<br>Likely<br>Likely |
| 556 | e22:5-LPS<br>e22:5-LPS                       | e16:1-LPI<br>22:6-LPG<br>e16:1-LPI, 22:6-LPG | Chromatography<br>Chromatography<br>Q3                | Likely<br>Likely<br>Likely |
| 557 | 22:5-LPG, e16:0-LPI<br>22:5-LPG<br>e16:0-LPI | e22:5-LPS<br>e22:5-LPS                       | Chromatography,Q3<br>Chromatography<br>Chromatography | Likely<br>Likely<br>Likely |
| 558 | e22:4-LPS<br>e22:4-LPS                       | e16:0-LPI<br>22:5-LPG<br>e16:0-LPI, 22:5-LPG | Chromatography<br>Chromatography<br>Q3                | Likely<br>Likely<br>Likely |
| 559 |                                              | 22:4-LPG<br>e22:4-LPS                        | Chromatography                                        | Likely                     |
| 569 |                                              | 16:1-LPI<br>22:6-LPS                         | Chromatography                                        | Experimental               |
| 570 |                                              | 22:5-LPS<br>16:1-LPI                         | Chromatography                                        | Likely                     |
| 571 |                                              | 16:0-LPI<br>22:5-LPS                         | Chromatography                                        | Experimental               |
| 572 |                                              | 22:4-LPS<br>16:0-LPI                         | Chromatography                                        | Experimental               |
| 583 |                                              | 17:1-LPI, e18:1-LPI                          | Unresolved                                            |                            |
| 584 |                                              | 17:1-LPI, e18:1-LPI                          | Unresolved                                            |                            |

**Supplemental Material Table 4. Analysis of lysophospholipids in mouse serum.**

Runs 1-4 are independent experiments prepared with 100  $\mu$ L of the same batch of mouse serum. Each sample was independently extracted and analyzed by LC/ESI-MSMS as described in the main text. We analyzed for 104 different lysophospholipids as described in the main text. Of these, discernable peaks in the selected ion chromatograms were observed for 80 species, and the levels of these are given in the table on the next page. Listed for each of the 4 runs are the LC retention time, the peak area in the selective ion chromatogram of the analyte and the internal standard, the ratio of peak area of analyte to that of the internal standard, the derived pmoles of analyte, the average pmole of the analyte for the 4 runs and the standard deviation for the 4 runs.

| Lysophospholipid | LC Ret. Time (min) | Analyte Area | IS Area   | Area Ratio | Pmoles Analytes | Average | Std Dev |
|------------------|--------------------|--------------|-----------|------------|-----------------|---------|---------|
| 16:1-LPG         | 9.6                | 596.945      | 23123.543 | 0.03       | 0.041304743     | 0.04    | 0.01    |
|                  | 9.6                | 765.564      | 30133.988 | 0.03       | 0.040648533     |         |         |
|                  | 9.6                | 606.248      | 26056.566 | 0.02       | 0.037226579     |         |         |
|                  | 10.18              | 905.967      | 27666.781 | 0.03       | 0.052393056     |         |         |
| 16:0-LPG         | 9.44               | 17717.629    | 23123.543 | 0.77       | 1.225945626     | 1.20    | 0.08    |
|                  | 9.52               | 23569.637    | 30133.988 | 0.78       | 1.251457962     |         |         |
|                  | 9.52               | 20431.846    | 26056.566 | 0.78       | 1.25461481      |         |         |
|                  | 9.93               | 18801.172    | 27666.781 | 0.68       | 1.087292201     |         |         |
| 18:2-LPG         | 9.44               | 17271.713    | 23123.543 | 0.75       | 1.195091116     | 1.08    | 0.08    |
|                  | 9.44               | 20437.828    | 30133.988 | 0.68       | 1.085170831     |         |         |
|                  | 9.44               | 17151.859    | 26056.566 | 0.66       | 1.053207641     |         |         |
|                  | 9.85               | 17196.244    | 27666.781 | 0.62       | 0.994477471     |         |         |
| 18:1-LPG         | 9.27               | 25804.059    | 23123.543 | 1.12       | 1.785474415     | 1.70    | 0.06    |
|                  | 9.27               | 31694.576    | 30133.988 | 1.05       | 1.682861279     |         |         |
|                  | 9.27               | 27136.906    | 26056.566 | 1.04       | 1.666338135     |         |         |
|                  | 9.69               | 28853.877    | 27666.781 | 1.04       | 1.668651051     |         |         |
| 18:0-LPG         | 9.11               | 7264.343     | 23123.543 | 0.31       | 0.502645672     | 0.52    | 0.03    |
|                  | 9.11               | 9314.28      | 30133.988 | 0.31       | 0.494552795     |         |         |
|                  | 9.11               | 8973.521     | 26056.566 | 0.34       | 0.551017874     |         |         |
|                  | 9.36               | 9429.198     | 27666.781 | 0.34       | 0.545300763     |         |         |
| 20:4-LPG         | 9.11               | 1803.158     | 23123.543 | 0.08       | 0.124766901     | 0.11    | 0.01    |
|                  | 9.36               | 2037.95      | 30133.988 | 0.07       | 0.108207384     |         |         |
|                  | 9.36               | 1857.881     | 26056.566 | 0.07       | 0.114082938     |         |         |
|                  | 9.85               | 1838.37      | 27666.781 | 0.07       | 0.106314934     |         |         |
| 20:3-LPG         | 9.11               | 1017.641     | 23123.543 | 0.04       | 0.070414192     | 0.08    | 0.01    |
|                  | 9.36               | 1539.328     | 30133.988 | 0.05       | 0.081732454     |         |         |
|                  | 8.95               | 1337.669     | 26056.566 | 0.05       | 0.082139389     |         |         |
|                  | 9.52               | 1464.645     | 27666.781 | 0.05       | 0.084702011     |         |         |
| 20:2-LPG         | 9.19               | 1055.71      | 23123.543 | 0.05       | 0.073048321     | 0.06    | 0.01    |
|                  | 9.19               | 1237.691     | 30133.988 | 0.04       | 0.065716678     |         |         |
|                  | 9.19               | 1106.735     | 26056.566 | 0.04       | 0.067958917     |         |         |
|                  | 9.52               | 877.706      | 27666.781 | 0.03       | 0.050758691     |         |         |
| 20:1-LPG         | 9.36               | 917.234      | 23123.543 | 0.04       | 0.063466676     | 0.05    | 0.01    |
|                  | 8.78               | 888.394      | 30133.988 | 0.03       | 0.047170338     |         |         |
|                  | 8.86               | 869.624      | 26056.566 | 0.03       | 0.053399147     |         |         |
|                  | 9.03               | 950.755      | 27666.781 | 0.03       | 0.054983194     |         |         |

|          |       |            |          |       |             |       |      |
|----------|-------|------------|----------|-------|-------------|-------|------|
| 16:0-LPI | 12.91 | 16825.674  | 3175.722 | 5.30  | 11.65608413 | 11.70 | 0.48 |
|          | 12.99 | 19720.25   | 3927.876 | 5.02  | 11.04529522 |       |      |
|          | 12.99 | 16410.34   | 3029.682 | 5.42  | 11.91634898 |       |      |
|          | 13.07 | 12372.168  | 2237.335 | 5.53  | 12.16571037 |       |      |
| 18:2-LPI | 12.82 | 26873.063  | 3175.722 | 8.46  | 18.61647166 | 18.46 | 1.16 |
|          | 12.91 | 32623.684  | 3927.876 | 8.31  | 18.2724976  |       |      |
|          | 12.99 | 27399.543  | 3029.682 | 9.04  | 19.89614573 |       |      |
|          | 13.07 | 17358.066  | 2237.335 | 7.76  | 17.06840737 |       |      |
| 18:1-LPI | 12.58 | 11422.723  | 3175.722 | 3.60  | 7.913158205 | 7.69  | 0.89 |
|          | 12.66 | 14428.296  | 3927.876 | 3.67  | 8.081276293 |       |      |
|          | 12.66 | 11516.819  | 3029.682 | 3.80  | 8.362924492 |       |      |
|          | 12.66 | 6492.835   | 2237.335 | 2.90  | 6.384487348 |       |      |
| 18:0-LPI | 12.17 | 138730.938 | 3175.722 | 43.68 | 96.10666916 | 91.23 | 6.63 |
|          | 12.25 | 165596.141 | 3927.876 | 42.16 | 92.75025744 |       |      |
|          | 12.33 | 130214.383 | 3029.682 | 42.98 | 94.55502016 |       |      |
|          | 12.5  | 82872.438  | 2237.335 | 37.04 | 81.48952374 |       |      |
| 20:4-LPI | 12.66 | 141580.188 | 3175.722 | 44.58 | 98.08050377 | 93.37 | 7.92 |
|          | 12.66 | 172446.453 | 3927.876 | 43.90 | 96.58711135 |       |      |
|          | 12.74 | 133953.453 | 3029.682 | 44.21 | 97.27014142 |       |      |
|          | 12.82 | 82909.055  | 2237.335 | 37.06 | 81.5255297  |       |      |
| 20:3-LPI | 12.58 | 27225.314  | 3175.722 | 8.57  | 18.8604956  | 17.38 | 1.68 |
|          | 12.58 | 32215.93   | 3927.876 | 8.20  | 18.04411494 |       |      |
|          | 12.5  | 24257.314  | 3029.682 | 8.01  | 17.61441986 |       |      |
|          | 12.74 | 15238.328  | 2237.335 | 6.81  | 14.984042   |       |      |
| 20:2-LPI | 12.33 | 2365.138   | 3175.722 | 0.74  | 1.63846319  | 1.68  | 0.29 |
|          | 12.33 | 2710.016   | 3927.876 | 0.69  | 1.517877652 |       |      |
|          | 12.41 | 2905.794   | 3029.682 | 0.96  | 2.110038875 |       |      |
|          | 12.17 | 1491.392   | 2237.335 | 0.67  | 1.466504748 |       |      |
| 20:1-LPI | 11.92 | 629.74     | 3175.722 | 0.20  | 0.43625607  | 0.44  | 0.03 |
|          | 12.17 | 795.069    | 3927.876 | 0.20  | 0.445317469 |       |      |
|          | 12.09 | 540.279    | 3029.682 | 0.18  | 0.392322957 |       |      |
|          | 12    | 483.816    | 2237.335 | 0.22  | 0.475742435 |       |      |
| 22:6-LPI | 12.74 | 1988.308   | 3175.722 | 0.63  | 1.377412003 | 1.06  | 0.21 |
|          | 12.74 | 1750.127   | 3927.876 | 0.45  | 0.980244641 |       |      |
|          | 12.74 | 1275.872   | 3029.682 | 0.42  | 0.926472943 |       |      |
|          | 12.91 | 982.383    | 2237.335 | 0.44  | 0.965989715 |       |      |
|          |       | 12.7825    |          |       |             |       |      |
| 22:5-LPI | 12.66 | 1492.09    | 3175.722 | 0.47  | 1.033654079 | 0.88  | 0.12 |
|          | 12.58 | 1350.16    | 3927.876 | 0.34  | 0.756223465 |       |      |
|          | 12.58 | 1217.607   | 3029.682 | 0.40  | 0.884163883 |       |      |
|          | 12.58 | 847.875    | 2237.335 | 0.38  | 0.833726286 |       |      |

|               |       |            |           |       |             |       |      |
|---------------|-------|------------|-----------|-------|-------------|-------|------|
| 22:4-LPI      | 12.25 | 933.576    | 3175.722  | 0.29  | 0.646740237 | 0.54  | 0.11 |
|               | 12.09 | 1004.349   | 3927.876  | 0.26  | 0.562535019 |       |      |
|               | 12.25 | 523.999    | 3029.682  | 0.17  | 0.380501254 |       |      |
|               | 12.2  | 594        | 2237.335  | 0.27  | 0.584087765 |       |      |
| 16:1-enyl-LPE | 13.09 | 53683.219  | 18501.73  | 2.90  | 22.0515846  | 18.40 | 2.55 |
|               | 13.17 | 55483.023  | 23061.918 | 2.41  | 18.28429772 |       |      |
|               | 13.09 | 40662.332  | 18680.604 | 2.18  | 16.5430263  |       |      |
|               | 13.34 | 26557.752  | 12062.629 | 2.20  | 16.73258087 |       |      |
| 18:2-enyl-LPE | 12.84 | 20154.563  | 18501.73  | 1.09  | 8.278938175 | 6.11  | 1.49 |
|               | 13.01 | 17686.398  | 23061.918 | 0.77  | 5.828510222 |       |      |
|               | 13.01 | 12088.612  | 18680.604 | 0.65  | 4.918119949 |       |      |
|               | 12.84 | 8607.646   | 12062.629 | 0.71  | 5.423204975 |       |      |
| 18:1-enyl-LPE | 12.52 | 27848.055  | 18501.73  | 1.51  | 11.43921233 | 8.47  | 2.01 |
|               | 12.43 | 24011.322  | 23061.918 | 1.04  | 7.912873821 |       |      |
|               | 12.52 | 18248.207  | 18680.604 | 0.98  | 7.424083996 |       |      |
|               | 12.51 | 11284.938  | 12062.629 | 0.94  | 7.110019615 |       |      |
| 16:1-LPE      | 14.82 | 2265.786   | 18501.73  | 0.12  | 0.293912321 | 0.26  | 0.04 |
|               | 14.82 | 2707.739   | 23061.918 | 0.12  | 0.28178808  |       |      |
|               | 14.82 | 1846.819   | 18680.604 | 0.10  | 0.237271    |       |      |
|               | 14.81 | 1102.06    | 12062.629 | 0.09  | 0.219267624 |       |      |
| 16:0-LPE      | 14.57 | 253239.188 | 18501.73  | 13.69 | 32.84957954 | 32.07 | 1.49 |
|               | 14.57 | 324570.125 | 23061.918 | 14.07 | 33.77725565 |       |      |
|               | 14.57 | 241469.047 | 18680.604 | 12.93 | 31.02285733 |       |      |
|               | 14.57 | 154027.625 | 12062.629 | 12.77 | 30.64558315 |       |      |
| 18:2-LPE      | 14.49 | 99344.695  | 18501.73  | 5.37  | 12.88675535 | 12.63 | 0.59 |
|               | 14.49 | 127728.883 | 23061.918 | 5.54  | 13.29244685 |       |      |
|               | 14.57 | 96761.977  | 18680.604 | 5.18  | 12.43154369 |       |      |
|               | 14.73 | 59932      | 12062.629 | 4.97  | 11.92416678 |       |      |
| 18:1-LPE      | 14.24 | 63280.305  | 18501.73  | 3.42  | 8.208569253 | 7.37  | 0.75 |
|               | 14.24 | 74767.281  | 23061.918 | 3.24  | 7.780856493 |       |      |
|               | 14.32 | 52960.699  | 18680.604 | 2.84  | 6.804152457 |       |      |
|               | 14.4  | 33580.047  | 12062.629 | 2.78  | 6.681139974 |       |      |
| 18:0-LPE      | 13.83 | 352539.563 | 18501.73  | 19.05 | 45.7305858  | 43.57 | 3.26 |
|               | 13.91 | 449193.75  | 23061.918 | 19.48 | 46.74654554 |       |      |
|               | 13.99 | 327456.656 | 18680.604 | 17.53 | 42.07015867 |       |      |
|               | 13.99 | 199601.813 | 12062.629 | 16.55 | 39.71309664 |       |      |
| 20:4-LPE      | 14.16 | 56808.68   | 18501.73  | 3.07  | 7.369085594 | 6.97  | 0.42 |

|          |       |           |           |      |             |      |      |
|----------|-------|-----------|-----------|------|-------------|------|------|
|          | 14.24 | 68952.43  | 23061.918 | 2.99 | 7.175718516 |      |      |
|          | 14.32 | 53887.637 | 18680.604 | 2.88 | 6.923241283 |      |      |
|          | 14.24 | 32145.559 | 12062.629 | 2.66 | 6.395731942 |      |      |
| 20:3-LPE | 14.16 | 10479.255 | 18501.73  | 0.57 | 1.359343802 | 1.31 | 0.16 |
|          | 14.16 | 14199.36  | 23061.918 | 0.62 | 1.477694266 |      |      |
|          | 14.24 | 10067.767 | 18680.604 | 0.54 | 1.293461432 |      |      |
|          | 14.32 | 5483.031  | 12062.629 | 0.45 | 1.090912636 |      |      |
| 20:2-LPE | 13.91 | 3912.191  | 18501.73  | 0.21 | 0.507480025 | 0.53 | 0.02 |
|          | 13.99 | 5185.378  | 23061.918 | 0.22 | 0.53963019  |      |      |
|          | 13.99 | 4284.974  | 18680.604 | 0.23 | 0.550514191 |      |      |
|          | 14.08 | 2617.201  | 12062.629 | 0.22 | 0.520722506 |      |      |
| 20:1-LPE | 13.75 | 8734.34   | 18501.73  | 0.47 | 1.132997617 | 0.97 | 0.15 |
|          | 13.66 | 10218.946 | 23061.918 | 0.44 | 1.063461868 |      |      |
|          | 13.75 | 6549.239  | 18680.604 | 0.35 | 0.841416776 |      |      |
|          | 13.66 | 4253.891  | 12062.629 | 0.35 | 0.846360972 |      |      |
| 20:0-LPE | 13.25 | 2159.367  | 18501.73  | 0.12 | 0.280107903 | 0.25 | 0.03 |
|          | 13.5  | 2361.955  | 23061.918 | 0.10 | 0.245803146 |      |      |
|          | 13.34 | 1639.391  | 18680.604 | 0.09 | 0.210621584 |      |      |
|          | 13.42 | 1410.454  | 12062.629 | 0.12 | 0.280626189 |      |      |
| 22:6-LPE | 14.16 | 35443.754 | 18501.73  | 1.92 | 4.597678682 | 4.30 | 0.45 |
|          | 14.24 | 45813.246 | 23061.918 | 1.99 | 4.767677623 |      |      |
|          | 14.24 | 30989.908 | 18680.604 | 1.66 | 3.981444026 |      |      |
|          | 14.4  | 19299.932 | 12062.629 | 1.60 | 3.839945405 |      |      |
| 22:5-LPE | 14.08 | 3886.364  | 18501.73  | 0.21 | 0.504129808 | 0.53 | 0.04 |
|          | 14.16 | 5536.838  | 23061.918 | 0.24 | 0.576205813 |      |      |
|          | 14.32 | 4128.241  | 18680.604 | 0.22 | 0.53037784  |      |      |
|          | 14.24 | 2481.588  | 12062.629 | 0.21 | 0.493740726 |      |      |
| 22:4-LPE | 13.99 | 2253.82   | 18501.73  | 0.12 | 0.29236012  | 0.26 | 0.04 |
|          | 13.75 | 2733.046  | 23061.918 | 0.12 | 0.284421721 |      |      |
|          | 13.75 | 2050.746  | 18680.604 | 0.11 | 0.263470624 |      |      |
|          | 13.99 | 1061.871  | 12062.629 | 0.09 | 0.211271556 |      |      |
| 16:0-LPS | 15.98 | 695.745   | 2373.985  | 0.29 | 0.703369229 | 0.73 | 0.08 |
|          | 15.98 | 1398.813  | 5050.69   | 0.28 | 0.664691597 |      |      |
|          | 16.06 | 1568.396  | 5470.979  | 0.29 | 0.688021358 |      |      |
|          | 16.48 | 1411.013  | 3999.983  | 0.35 | 0.846611398 |      |      |
| 18:2-LPS | 15.98 | 286.786   | 2373.985  | 0.12 | 0.289928706 | 0.41 | 0.14 |
|          | 16.15 | 881.571   | 5050.69   | 0.17 | 0.418907199 |      |      |
|          | 16.15 | 717.987   | 5470.979  | 0.13 | 0.314965347 |      |      |
|          | 16.15 | 1013.23   | 3999.983  | 0.25 | 0.607940584 |      |      |



|          |       |            |           |       |             |        |      |
|----------|-------|------------|-----------|-------|-------------|--------|------|
| 18:1-LPS | 15.9  | 1344.99    | 2373.985  | 0.57  | 1.359728895 | 1.78   | 0.29 |
|          | 15.65 | 4035.037   | 5050.69   | 0.80  | 1.917379368 |        |      |
|          | 15.82 | 4601.515   | 5470.979  | 0.84  | 2.018584974 |        |      |
|          | 15.98 | 3055.957   | 3999.983  | 0.76  | 1.833581993 |        |      |
| 18:0-LPS | 14.17 | 3616.073   | 2373.985  | 1.52  | 3.655699257 | 3.09   | 0.45 |
|          | 15.32 | 6834.187   | 5050.69   | 1.35  | 3.247486739 |        |      |
|          | 15.49 | 6333.017   | 5470.979  | 1.16  | 2.778157401 |        |      |
|          | 15.57 | 4460.246   | 3999.983  | 1.12  | 2.676158974 |        |      |
| 20:4-LPS | 15.74 | 2597.117   | 2373.985  | 1.09  | 2.625577162 | 2.97   | 0.33 |
|          | 15.82 | 7178.017   | 5050.69   | 1.42  | 3.410868772 |        |      |
|          | 15.65 | 6461.268   | 5470.979  | 1.18  | 2.834418337 |        |      |
|          | 15.98 | 5030.203   | 3999.983  | 1.26  | 3.018134627 |        |      |
| 20:3-LPS | 15.24 | 667.918    | 2373.985  | 0.28  | 0.675237291 | 0.84   | 0.12 |
|          | 15.41 | 2022.891   | 5050.69   | 0.40  | 0.961242602 |        |      |
|          | 15.49 | 1989.514   | 5470.979  | 0.36  | 0.872756704 |        |      |
|          | 15.49 | 1400.653   | 3999.983  | 0.35  | 0.840395372 |        |      |
| 22:6-LPS | 15.74 | 1051.759   | 2373.985  | 0.44  | 1.063284562 | 1.37   | 0.30 |
|          | 15.82 | 3746.568   | 5050.69   | 0.74  | 1.780303919 |        |      |
|          | 15.9  | 2945.069   | 5470.979  | 0.54  | 1.291937988 |        |      |
|          | 15.82 | 2213.227   | 3999.983  | 0.55  | 1.327941844 |        |      |
| 22:5-LPS | 15.32 | 435.617    | 2373.985  | 0.18  | 0.440390651 | 0.38   | 0.06 |
|          | 15.49 | 682.738    | 5050.69   | 0.14  | 0.324425217 |        |      |
|          | 15.74 | 765.128    | 5470.979  | 0.14  | 0.335645083 |        |      |
|          | 15.98 | 696.729    | 3999.983  | 0.17  | 0.418039177 |        |      |
| 22:4-LPS | 12.78 | 2916.323   | 2373.985  | 1.23  | 2.948281139 | 1.79   | 0.78 |
|          | 12.86 | 3196.228   | 5050.69   | 0.63  | 1.518791927 |        |      |
|          | 12.86 | 3142.564   | 5470.979  | 0.57  | 1.378574767 |        |      |
|          | 13.27 | 2192.772   | 3999.983  | 0.55  | 1.315668792 |        |      |
| 16:1-LPA | 21.91 | 12428.062  | 13708.649 | 0.91  | 3.988976069 | 3.36   | 0.52 |
|          | 21.91 | 10762.171  | 16711.295 | 0.64  | 2.833625545 |        |      |
|          | 22    | 9942.192   | 14402.116 | 0.69  | 3.037445664 |        |      |
|          | 22.24 | 8930.133   | 11004.484 | 0.81  | 3.570597695 |        |      |
| 16:0-LPA | 21.5  | 350604.938 | 13708.649 | 25.58 | 112.5320028 | 100.16 | 9.38 |
|          | 21.59 | 357437.281 | 16711.295 | 21.39 | 94.11143998 |        |      |
|          | 21.59 | 334618.281 | 14402.116 | 23.23 | 102.2294527 |        |      |
|          | 21.75 | 229559.234 | 11004.484 | 20.86 | 91.78627818 |        |      |
| 18:3-LPA | 21.75 | 4129.667   | 13708.649 | 0.30  | 1.325479615 | 1.31   | 0.14 |
|          | 22    | 4307.937   | 16711.295 | 0.26  | 1.134258165 |        |      |

|          |       |            |           |       |             |        |       |
|----------|-------|------------|-----------|-------|-------------|--------|-------|
|          | 21.83 | 4246.736   | 14402.116 | 0.29  | 1.297423129 |        |       |
|          | 22    | 3695.517   | 11004.484 | 0.34  | 1.477604475 |        |       |
|          |       |            | 21.895    |       |             |        |       |
| 18:2-LPA | 21.59 | 759249.313 | 13708.649 | 55.38 | 243.6926481 | 227.86 | 13.49 |
|          | 21.59 | 856066.625 | 16711.295 | 51.23 | 225.3980407 |        |       |
|          | 21.59 | 756680.75  | 14402.116 | 52.54 | 231.1740372 |        |       |
|          | 21.67 | 528155.75  | 11004.484 | 47.99 | 211.1762169 |        |       |
| 18:1-LPA | 21.09 | 154127.547 | 13708.649 | 11.24 | 49.46958718 | 54.83  | 4.94  |
|          | 21.17 | 207213.094 | 16711.295 | 12.40 | 54.55816641 |        |       |
|          | 21.17 | 201046.531 | 14402.116 | 13.96 | 61.42185887 |        |       |
|          | 21.34 | 134746.125 | 11004.484 | 12.24 | 53.87648798 |        |       |
| 18:0-LPA | 20.76 | 62609.645  | 13708.649 | 4.57  | 20.09552057 | 24.28  | 4.08  |
|          | 20.85 | 88131.992  | 16711.295 | 5.27  | 23.20471063 |        |       |
|          | 20.85 | 97734.492  | 14402.116 | 6.79  | 29.8589294  |        |       |
|          | 20.93 | 59905.402  | 11004.484 | 5.44  | 23.95239693 |        |       |
| 20:4-LPA | 21.17 | 210261.297 | 13708.649 | 15.34 | 67.48657047 | 75.15  | 6.70  |
|          | 21.17 | 290805.125 | 16711.295 | 17.40 | 76.56752813 |        |       |
|          | 21.17 | 273266.031 | 14402.116 | 18.97 | 83.48568616 |        |       |
|          | 21.34 | 182683.172 | 11004.484 | 16.60 | 73.04349362 |        |       |
| 20:3-LPA | 21.09 | 53277.234  | 13708.649 | 3.89  | 17.10014091 | 19.28  | 2.51  |
|          | 21.09 | 72465.219  | 16711.295 | 4.34  | 19.07972803 |        |       |
|          | 21.17 | 74747.414  | 14402.116 | 5.19  | 22.83613197 |        |       |
|          | 21.26 | 45262.148  | 11004.484 | 4.11  | 18.09748201 |        |       |
| 20:2-LPA | 21.01 | 4738.052   | 13708.649 | 0.35  | 1.520750061 | 1.78   | 0.18  |
|          | 21.09 | 7126.683   | 16711.295 | 0.43  | 1.876419823 |        |       |
|          | 20.93 | 6267.542   | 14402.116 | 0.44  | 1.914800908 |        |       |
|          | 21.09 | 4483.174   | 11004.484 | 0.41  | 1.792538896 |        |       |
|          |       |            | 21.03     |       |             | 0.40   |       |
| 20:1-LPA | 20.35 | 1341.266   | 13708.649 | 0.10  | 0.430499782 | 0.51   | 0.10  |
|          | 20.43 | 1710.788   | 16711.295 | 0.10  | 0.450441884 |        |       |
|          | 20.52 | 2157.772   | 14402.116 | 0.15  | 0.659222353 |        |       |
|          | 20.6  | 1286.739   | 11004.484 | 0.12  | 0.514485877 |        |       |
| 22:6-LPA | 21.17 | 163263.984 | 13708.649 | 11.91 | 52.40206599 | 57.70  | 5.95  |
|          | 21.17 | 211831.578 | 16711.295 | 12.68 | 55.77419004 |        |       |
|          | 21.17 | 216761.891 | 14402.116 | 15.05 | 66.22306892 |        |       |
|          | 21.34 | 141101.375 | 11004.484 | 12.82 | 56.41755215 |        |       |
| 22:5-LPA | 21.09 | 13919.162  | 13708.649 | 1.02  | 4.467567358 | 4.97   | 0.42  |
|          | 21.17 | 18392.666  | 16711.295 | 1.10  | 4.842696535 |        |       |
|          | 21.01 | 17894.838  | 14402.116 | 1.24  | 5.467063812 |        |       |
|          | 21.42 | 12757.006  | 11004.484 | 1.16  | 5.10072316  |        |       |

|          |       |             |           |         |             |         |       |
|----------|-------|-------------|-----------|---------|-------------|---------|-------|
| 22:4-LPA | 20.85 | 1268.932    | 13708.649 | 0.09    | 0.407283081 | 0.42    | 0.04  |
|          | 21.01 | 1457.795    | 16711.295 | 0.09    | 0.383830098 |         |       |
|          | 20.68 | 1476.652    | 14402.116 | 0.10    | 0.451132931 |         |       |
|          | 21.17 | 1141.835    | 11004.484 | 0.10    | 0.456547894 |         |       |
| 14:0-LPC | 35.71 | 77921.539   | 7870.779  | 9.90    | 5.940063036 | 7.66    | 1.46  |
|          | 35.7  | 110587.086  | 9066.454  | 12.20   | 7.318434704 |         |       |
|          | 35.75 | 142168.109  | 9013.73   | 15.77   | 9.463436935 |         |       |
|          | 35.7  | 145978.703  | 11050.068 | 13.21   | 7.926396634 |         |       |
| 16:1-LPC | 35.01 | 366384.844  | 7870.779  | 46.55   | 27.93000622 | 33.51   | 4.49  |
|          | 35.06 | 491318.281  | 9066.454  | 54.19   | 32.51447243 |         |       |
|          | 35.06 | 580473.688  | 9013.73   | 64.40   | 38.63929947 |         |       |
|          | 35.06 | 643580.25   | 11050.068 | 58.24   | 34.94531889 |         |       |
| 16:0-LPC | 34.31 | 28442774    | 7870.779  | 3613.72 | 2168.230667 | 2156.28 | 89.09 |
|          | 34.31 | 33360640    | 9066.454  | 3679.57 | 2207.741196 |         |       |
|          | 34.31 | 33381886    | 9013.73   | 3703.45 | 2222.069177 |         |       |
|          | 34.31 | 37332472    | 11050.068 | 3378.48 | 2027.090078 |         |       |
| 18:3-LPC | 34.91 | 63133.68    | 7870.779  | 8.02    | 4.812764785 | 5.66    | 0.68  |
|          | 35.01 | 83140.406   | 9066.454  | 9.17    | 5.502067688 |         |       |
|          | 34.96 | 96280.953   | 9013.73   | 10.68   | 6.408952986 |         |       |
|          | 35.01 | 109188.359  | 11050.068 | 9.88    | 5.92874319  |         |       |
| 18:2-LPC | 34.46 | 13414184    | 7870.779  | 1704.30 | 1022.58117  | 1013.73 | 51.59 |
|          | 34.46 | 15627053    | 9066.454  | 1723.61 | 1034.167471 |         |       |
|          | 34.46 | 15901680    | 9013.73   | 1764.16 | 1058.497204 |         |       |
|          | 34.51 | 17305610    | 11050.068 | 1566.11 | 939.6653487 |         |       |
| 18:1-LPC | 33.72 | 8137876     | 7870.779  | 1033.94 | 620.3611612 | 627.63  | 24.55 |
|          | 33.67 | 9789562     | 9066.454  | 1079.76 | 647.8538577 |         |       |
|          | 33.67 | 9708864     | 9013.73   | 1077.12 | 646.2716767 |         |       |
|          | 33.72 | 10977009    | 11050.068 | 993.39  | 596.0330199 |         |       |
| 18:0-LPC | 32.97 | 28269252    | 7870.779  | 3591.67 | 2155.002853 | 2181.40 | 94.32 |
|          | 33.02 | 33749136    | 9066.454  | 3722.42 | 2233.451093 |         |       |
|          | 32.92 | 34187580    | 9013.73   | 3792.83 | 2275.700293 |         |       |
|          | 33.02 | 37965076    | 11050.068 | 3435.73 | 2061.439405 |         |       |
| 20:4-LPC | 33.92 | 2044180.25  | 7870.779  | 259.72  | 155.8305919 | 157.27  | 5.71  |
|          | 33.96 | 2437235     | 9066.454  | 268.82  | 161.2913935 |         |       |
|          | 33.86 | 2436060.25  | 9013.73   | 270.26  | 162.1566377 |         |       |
|          | 33.92 | 2758854     | 11050.068 | 249.67  | 149.8011053 |         |       |
| 20:3-LPC | 33.72 | 980375.5    | 7870.779  | 124.56  | 74.73533433 | 74.28   | 3.04  |
|          | 33.72 | 1153778.875 | 9066.454  | 127.26  | 76.35480476 |         |       |
|          | 33.72 | 1144177.25  | 9013.73   | 126.94  | 76.16229352 |         |       |
|          | 33.76 | 1286374.125 | 11050.068 | 116.41  | 69.84793894 |         |       |

|               |       |            |           |        |             |        |       |
|---------------|-------|------------|-----------|--------|-------------|--------|-------|
| 20:2-LPC      | 33.27 | 318250.094 | 7870.779  | 40.43  | 24.26062991 | 24.48  | 0.86  |
|               | 33.22 | 375879.844 | 9066.454  | 41.46  | 24.87498491 |        |       |
|               | 33.17 | 381346.938 | 9013.73   | 42.31  | 25.38440388 |        |       |
|               | 33.27 | 430597.375 | 11050.068 | 38.97  | 23.38070906 |        |       |
| 20:1-LPC      | 32.32 | 384655.844 | 7870.779  | 48.87  | 29.32282896 | 29.00  | 1.49  |
|               | 32.32 | 454614.125 | 9066.454  | 50.14  | 30.08546395 |        |       |
|               | 32.42 | 447245.844 | 9013.73   | 49.62  | 29.77097233 |        |       |
|               | 32.47 | 493699.75  | 11050.068 | 44.68  | 26.80706128 |        |       |
| 20:0-LPC      | 31.53 | 249262.797 | 7870.779  | 31.67  | 19.00163608 | 17.91  | 1.11  |
|               | 31.53 | 278261.219 | 9066.454  | 30.69  | 18.41477731 |        |       |
|               | 31.43 | 267580.625 | 9013.73   | 29.69  | 17.81153585 |        |       |
|               | 31.53 | 302138.813 | 11050.068 | 27.34  | 16.40562645 |        |       |
| 22:6-LPC      | 33.87 | 3361822.75 | 7870.779  | 427.13 | 256.2762403 | 244.35 | 14.19 |
|               | 33.91 | 3825779.75 | 9066.454  | 421.97 | 253.1825397 |        |       |
|               | 33.91 | 3652674.25 | 9013.73   | 405.23 | 243.140692  |        |       |
|               | 33.92 | 4140182.75 | 11050.068 | 374.67 | 224.8049198 |        |       |
| 22:5-LPC      | 33.87 | 359645.656 | 7870.779  | 45.69  | 27.41626891 | 26.85  | 0.94  |
|               | 33.86 | 415781.344 | 9066.454  | 45.86  | 27.51558728 |        |       |
|               | 33.86 | 405428.938 | 9013.73   | 44.98  | 26.98742505 |        |       |
|               | 33.87 | 469200.625 | 11050.068 | 42.46  | 25.47680023 |        |       |
| 22:4-LPC      | 33.17 | 34575.82   | 7870.779  | 4.39   | 2.635760958 | 2.48   | 0.16  |
|               | 32.97 | 38880.352  | 9066.454  | 4.29   | 2.573024823 |        |       |
|               | 32.92 | 36643.434  | 9013.73   | 4.07   | 2.439174504 |        |       |
|               | 33.17 | 42030.207  | 11050.068 | 3.80   | 2.282169141 |        |       |
| 24:0-LPC      | 29.19 | 63399.984  | 7870.779  | 8.06   | 4.833065495 | 4.27   | 0.39  |
|               | 29.19 | 64133      | 9066.454  | 7.07   | 4.24419514  |        |       |
|               | 29.14 | 60614.059  | 9013.73   | 6.72   | 4.034781983 |        |       |
|               | 29.19 | 73252.422  | 11050.068 | 6.63   | 3.9774826   |        |       |
| 16:1-enyl-LPC | 32.08 | 52219.355  | 7870.779  | 6.63   | 13.26917069 | 13.86  | 0.66  |
|               | 32.08 | 64338.27   | 9066.454  | 7.10   | 14.19259834 |        |       |
|               | 32.07 | 65946.734  | 9013.73   | 7.32   | 14.63250708 |        |       |
|               | 32.08 | 73752.469  | 11050.068 | 6.67   | 13.34878102 |        |       |
| 18:2-enyl-LPC | 32.92 | 137894.875 | 7870.779  | 17.52  | 35.03970192 | 34.81  | 1.39  |
|               | 33.02 | 158065.641 | 9066.454  | 17.43  | 34.86823867 |        |       |
|               | 32.97 | 163866.516 | 9013.73   | 18.18  | 36.35931318 |        |       |
|               | 32.97 | 182204.922 | 11050.068 | 16.49  | 32.97806348 |        |       |
| 18:1-enyl-LPC | 30.48 | 6259.815   | 7870.779  | 0.80   | 1.590646872 | 1.58   | 0.01  |

|                |       |             |           |        |             |        |       |
|----------------|-------|-------------|-----------|--------|-------------|--------|-------|
|                | 30.53 | 7187.655    | 9066.454  | 0.79   | 1.585549323 |        |       |
|                | 30.43 | 7035.433    | 9013.73   | 0.78   | 1.56104809  |        |       |
|                | 30.58 | 8654.604    | 11050.068 | 0.78   | 1.566434523 |        |       |
| 16:0-alkyl-LPC | 33.92 | 222849.234  | 6978.524  | 31.93  | 57.48043873 | 53.21  | 3.60  |
|                | 33.86 | 259374.266  | 9512.854  | 27.27  | 49.07819239 |        |       |
|                | 33.81 | 277169.375  | 9159.732  | 30.26  | 54.46719129 |        |       |
|                | 33.92 | 314538.531  | 10924.943 | 28.79  | 51.82355238 |        |       |
| 18:1-alkyl-LPC | 33.27 | 173007.422  | 6978.524  | 24.79  | 44.62453086 | 41.93  | 1.95  |
|                | 33.27 | 212114.438  | 9512.854  | 22.30  | 40.13579819 |        |       |
|                | 33.22 | 213677.922  | 9159.732  | 23.33  | 41.99033985 |        |       |
|                | 33.32 | 248703.781  | 10924.943 | 22.76  | 40.97658045 |        |       |
| 18:0-alkyl-LPC | 33.67 | 969999      | 6978.524  | 139.00 | 250.1959154 | 228.41 | 15.04 |
|                | 33.67 | 1172888.375 | 9512.854  | 123.30 | 221.931197  |        |       |
|                | 33.62 | 1147448.125 | 9159.732  | 125.27 | 225.4876698 |        |       |
|                | 33.67 | 1311073.875 | 10924.943 | 120.01 | 216.0132987 |        |       |

**Supplemental Material Table 5. Changes in lysophospholipase species in HEK293 cells in response to human group X secreted phospholipase A<sub>2</sub> action. See main text for more details.**

| WT HEK (A) WT HEK 2 (E) Average Standard Deviation |       |       |       | WT HEK (+) 200 ng/ml hGX (B) WT HEK (+) 200 ng/ml hGX (F) Average Standard Deviation |       |       |       | pre-pro-hGX overexpressed (C) pre-pro-hGX overexpressed (D) pre-pro-hGX overexpressed (G) Average Standard Deviation |       |       |       |       |      |
|----------------------------------------------------|-------|-------|-------|--------------------------------------------------------------------------------------|-------|-------|-------|----------------------------------------------------------------------------------------------------------------------|-------|-------|-------|-------|------|
| (12:0)-LPG                                         | 0.23  | 0.32  | 0.28  | 0.06                                                                                 | 0.30  | 0.23  | 0.26  | 0.05                                                                                                                 | 0.22  | 0.32  | 0.14  | 0.22  | 0.09 |
| (14:0)-LPG                                         | 7.60  | 7.66  | 7.63  | 0.04                                                                                 | 11.50 | 10.18 | 10.84 | 0.93                                                                                                                 | 4.82  | 4.54  | 3.20  | 4.19  | 0.87 |
| (16:0)-LPG                                         | 1.22  | 1.30  | 1.31  | 0.01                                                                                 | 1.32  | 1.34  | 1.33  | 0.01                                                                                                                 | 0.90  | 0.82  | 0.62  | 0.78  | 0.14 |
| (18:0)-LPG                                         | 9.44  | 8.54  | 8.99  | 0.64                                                                                 | 10.32 | 10.96 | 10.64 | 0.45                                                                                                                 | 7.80  | 7.12  | 6.72  | 7.21  | 0.55 |
| (18:1)-LPG                                         | 49.12 | 45.32 | 47.22 | 2.89                                                                                 | 51.68 | 51.54 | 51.61 | 0.13                                                                                                                 | 34.22 | 30.22 | 28.40 | 30.28 | 3.91 |
| (20:0)-LPG                                         | 1.10  | 1.06  | 1.08  | 0.03                                                                                 | 1.22  | 1.24  | 1.23  | 0.01                                                                                                                 | 2.48  | 2.08  | 1.94  | 2.17  | 0.28 |
| (20:3)-LPG                                         | 0.04  | 0.02  | 0.03  | 0.00                                                                                 | 0.00  | 0.04  | 0.02  | 0.00                                                                                                                 | 0.22  | 0.12  | 0.10  | 0.15  | 0.08 |
| (20:4)-LPG                                         | 0.02  | 0.18  | 0.18  | 0.01                                                                                 | 0.14  | 0.20  | 0.17  | 0.04                                                                                                                 | 0.12  | 0.18  | 0.39  | 0.13  | 0.05 |
| (20:1)-LPG                                         | 1.78  | 1.98  | 1.88  | 0.14                                                                                 | 2.32  | 2.24  | 2.28  | 0.08                                                                                                                 | 1.08  | 1.04  | 0.86  | 0.99  | 0.12 |
| (20:2)-LPG                                         | 0.88  | 0.76  | 0.82  | 0.08                                                                                 | 1.00  | 0.98  | 0.99  | 0.01                                                                                                                 | 1.40  | 1.08  | 1.02  | 1.17  | 0.20 |
| (20:3)-LPG                                         | 0.90  | 0.92  | 0.91  | 0.01                                                                                 | 0.96  | 1.06  | 0.96  | 0.01                                                                                                                 | 1.36  | 1.16  | 1.16  | 1.05  | 0.16 |
| (20:4)-LPG                                         | 0.12  | 0.14  | 0.13  | 0.01                                                                                 | 0.18  | 0.18  | 0.18  | 0.00                                                                                                                 | 0.26  | 1.00  | 0.92  | 1.06  | 0.18 |
| (22:4)-LPG                                         | 0.12  | 0.10  | 0.11  | 0.01                                                                                 | 0.10  | 0.10  | 0.05  | 0.07                                                                                                                 | 0.86  | 0.64  | 0.72  | 0.62  | 0.18 |
| (22:5)-LPG                                         | 0.24  | 0.22  | 0.23  | 0.01                                                                                 | 0.28  | 0.28  | 0.28  | 0.00                                                                                                                 | 2.28  | 1.48  | 1.88  | 1.88  | 0.40 |
| (22:6)-LPG                                         | 0.30  | 0.38  | 0.34  | 0.06                                                                                 | 0.24  | 0.30  | 0.27  | 0.04                                                                                                                 | 1.68  | 1.32  | 1.54  | 1.51  | 0.18 |

| Exogenous/WT SD |      | Overexpression/WT SD |      |
|-----------------|------|----------------------|------|
| (12:0)-LPG      | 0.95 | 0.28                 | 0.81 |
| (14:0)-LPG      | 1.42 | 0.12                 | 0.55 |
| (16:0)-LPG      | 1.12 | 0.02                 | 0.60 |
| (18:0)-LPG      | 1.18 | 0.10                 | 0.80 |
| (18:1)-LPG      | 1.09 | 0.06                 | 0.64 |
| (20:0)-LPG      | 1.11 | 0.03                 | 0.21 |
| (20:3)-LPG      | 0.67 | 0.99                 | 0.89 |
| (20:4)-LPG      | 0.89 | 0.35                 | 0.87 |
| (20:1)-LPG      | 1.21 | 0.10                 | 1.53 |
| (20:2)-LPG      | 1.21 | 0.13                 | 0.42 |
| (20:3)-LPG      | 1.12 | 0.16                 | 0.52 |
| (20:4)-LPG      | 1.38 | 0.15                 | 0.15 |
| (22:4)-LPG      | 0.45 | 0.65                 | 0.55 |
| (22:5)-LPG      | 1.13 | 0.07                 | 0.81 |
| (22:6)-LPG      | 0.79 | 0.18                 | 0.45 |

| WT HEK (A) WT HEK 2 (E) Average Standard Deviation |        |        |        | WT HEK (+) 200 ng/ml hGX (B) WT HEK (+) 200 ng/ml hGX (F) Average Standard Deviation |        |        |        | pre-pro-hGX overexpressed (C) pre-pro-hGX overexpressed (D) pre-pro-hGX overexpressed (G) Average Standard Deviation |       |       |       |       |      |
|----------------------------------------------------|--------|--------|--------|--------------------------------------------------------------------------------------|--------|--------|--------|----------------------------------------------------------------------------------------------------------------------|-------|-------|-------|-------|------|
| (12:0)-LPI                                         | 9.90   | 7.96   | 8.93   | 1.37                                                                                 | 10.23  | 8.29   | 9.26   | 1.37                                                                                                                 | 2.06  | 2.04  | 1.36  | 1.70  | 0.48 |
| (14:0)-LPI                                         | 0.92   | 0.93   | 0.93   | 0.00                                                                                 | 1.02   | 0.71   | 0.87   | 0.22                                                                                                                 | 0.51  | 0.25  | 0.13  | 0.19  | 0.08 |
| (16:0)-LPI                                         | 123.38 | 106.85 | 115.12 | 11.69                                                                                | 110.92 | 103.78 | 107.35 | 5.05                                                                                                                 | 25.86 | 24.70 | 22.33 | 23.51 | 1.88 |
| (18:0)-LPI                                         | 23.25  | 20.02  | 21.64  | 2.29                                                                                 | 12.44  | 15.28  | 13.86  | 2.01                                                                                                                 | 12.44 | 12.44 | 2.80  | 3.23  | 0.60 |
| (18:2)-LPI                                         | 2.00   | 1.48   | 1.74   | 0.37                                                                                 | 1.10   | 1.17   | 1.13   | 0.05                                                                                                                 | 1.41  | 1.07  | 0.65  | 0.86  | 0.30 |
| (20:0)-LPI                                         | 1.84   | 1.98   | 1.87   | 0.04                                                                                 | 0.89   | 1.28   | 1.08   | 0.27                                                                                                                 | 0.00  | 0.00  | 0.00  | 0.00  | 0.00 |
| (20:1)-LPI                                         | 5.67   | 4.12   | 4.90   | 1.10                                                                                 | 3.15   | 3.48   | 3.32   | 0.23                                                                                                                 | 0.00  | 0.53  | 0.34  | 0.44  | 0.13 |
| (20:3)-LPI                                         | 3.09   | 2.24   | 2.67   | 0.61                                                                                 | 1.50   | 2.22   | 1.86   | 0.51                                                                                                                 | 1.59  | 2.13  | 1.80  | 1.96  | 0.24 |
| (20:4)-LPI                                         | 6.67   | 4.09   | 5.38   | 1.82                                                                                 | 3.23   | 3.77   | 3.50   | 0.38                                                                                                                 | 6.57  | 7.04  | 6.44  | 6.74  | 0.42 |
| (22:4)-LPI                                         |        |        |        |                                                                                      |        |        |        |                                                                                                                      |       |       |       |       |      |
| (22:5)-LPI                                         |        |        |        |                                                                                      |        |        |        |                                                                                                                      |       |       |       |       |      |
| (22:6)-LPI                                         |        |        |        |                                                                                      |        |        |        |                                                                                                                      |       |       |       |       |      |

| Exogenous/WT SD |      | Overexpression/WT SD |      |
|-----------------|------|----------------------|------|
| (12:0)-LPI      | 1.04 | 0.22                 | 0.19 |
| (14:0)-LPI      | 0.94 | 0.23                 | 0.20 |
| (16:0)-LPI      | 0.93 | 0.10                 | 0.20 |
| (18:0)-LPI      | 0.65 | 0.14                 | 0.15 |
| (18:2)-LPI      | 0.65 | 0.14                 | 0.49 |
| (20:0)-LPI      | 0.85 | 0.14                 | 0.50 |
| (20:1)-LPI      | 0.68 | 0.16                 | 0.09 |
| (20:3)-LPI      | 0.70 | 0.23                 | 0.74 |
| (20:4)-LPI      | 0.65 | 0.23                 | 1.25 |
| (22:4)-LPI      |      |                      |      |
| (22:5)-LPI      |      |                      |      |
| (22:6)-LPI      |      |                      |      |

| WT HEK (A) WT HEK 2 (E) Average Standard Deviation |       |       |       | WT HEK (+) 200 ng/ml hGX (B) WT HEK (+) 200 ng/ml hGX (F) Average Standard Deviation |        |        |        | pre-pro-hGX overexpressed (C) pre-pro-hGX overexpressed (D) pre-pro-hGX overexpressed (G) Average Standard Deviation |        |        |        |        |      |
|----------------------------------------------------|-------|-------|-------|--------------------------------------------------------------------------------------|--------|--------|--------|----------------------------------------------------------------------------------------------------------------------|--------|--------|--------|--------|------|
| (12:0)-LPE                                         | 1.36  | 1.17  | 1.27  | 0.13                                                                                 | 2.63   | 2.86   | 2.74   | 0.16                                                                                                                 | 1.08   | 0.87   | 0.98   | 0.92   | 0.08 |
| (14:0)-LPE                                         | 40.02 | 39.65 | 39.83 | 0.28                                                                                 | 99.74  | 104.23 | 101.99 | 3.18                                                                                                                 | 52.44  | 45.52  | 43.77  | 44.64  | 1.24 |
| (16:0)-LPE                                         | 4.51  | 3.93  | 4.22  | 0.41                                                                                 | 4.07   | 9.79   | 8.86   | 1.31                                                                                                                 | 3.40   | 3.75   | 3.16   | 3.45   | 0.41 |
| (18:0)-LPE                                         | 39.93 | 37.99 | 38.96 | 1.38                                                                                 | 172.01 | 169.31 | 169.31 | 3.81                                                                                                                 | 146.15 | 137.27 | 126.30 | 131.76 | 7.76 |
| (18:1)-LPE                                         | 40.50 | 38.64 | 39.67 | 1.32                                                                                 | 194.81 | 194.81 | 192.08 | 3.57                                                                                                                 | 50.69  | 44.72  | 45.02  | 44.67  | 0.21 |
| (18:2)-LPE                                         | 1.82  | 2.02  | 1.92  | 0.14                                                                                 | 3.20   | 3.31   | 3.26   | 0.08                                                                                                                 | 3.25   | 2.76   | 2.72   | 2.74   | 0.02 |
| (20:0)-LPE                                         | 0.79  | 0.94  | 0.87  | 0.10                                                                                 | 0.54   | 4.64   | 5.09   | 0.63                                                                                                                 | 3.70   | 3.96   | 3.34   | 3.65   | 0.44 |
| (20:1)-LPE                                         | 3.31  | 2.90  | 3.11  | 0.29                                                                                 | 11.42  | 11.13  | 11.27  | 0.21                                                                                                                 | 5.32   | 4.74   | 4.92   | 4.83   | 0.13 |
| (20:2)-LPE                                         | 0.59  | 0.69  | 0.64  | 0.07                                                                                 | 0.66   | 0.87   | 0.76   | 0.15                                                                                                                 | 0.87   | 0.76   | 0.84   | 0.85   | 0.14 |
| (20:3)-LPE                                         | 0.59  | 0.66  | 0.64  | 0.07                                                                                 | 0.66   | 0.87   | 0.76   | 0.15                                                                                                                 | 0.87   | 0.76   | 0.84   | 0.85   | 0.14 |
| (20:4)-LPE                                         | 0.42  | 2.16  | 1.87  | 0.41                                                                                 | 1.48   | 1.58   | 1.52   | 0.00                                                                                                                 | 1.58   | 1.52   | 1.52   | 1.52   | 0.00 |
| (22:4)-LPE                                         | 0.34  | 0.47  | 0.41  | 0.09                                                                                 | 0.42   | 0.49   | 0.45   | 0.00                                                                                                                 | 2.28   | 2.15   | 2.55   | 2.35   | 0.28 |
| (22:5)-LPE                                         | 0.25  | 0.21  | 0.23  | 0.03                                                                                 | 0.00   | 0.14   | 0.07   | 0.10                                                                                                                 | 0.59   | 0.77   | 0.79   | 0.78   | 0.01 |
| (22:6)-LPE                                         | 0.21  | 0.22  | 0.21  | 0.01                                                                                 | 0.16   | 0.25   | 0.21   | 0.06                                                                                                                 | 0.40   | 0.35   | 0.35   | 0.35   | 0.00 |

| Exogenous/WT SD |      | Overexpression/WT SD |      |
|-----------------|------|----------------------|------|
| (12:0)-LPE      | 2.17 | 0.28                 | 0.73 |
| (14:0)-LPE      | 2.50 | 0.08                 | 1.12 |
| (16:0)-LPE      | 2.10 | 0.37                 | 0.82 |
| (18:0)-LPE      | 4.35 | 0.18                 | 3.38 |
| (18:1)-LPE      | 2.58 | 0.12                 | 1.13 |
| (18:2)-LPE      | 1.70 | 0.13                 | 1.43 |
| (20:0)-LPE      | 5.87 | 1.01                 | 4.21 |
| (20:1)-LPE      | 3.63 | 0.24                 | 1.56 |
| (20:2)-LPE      | 1.19 | 0.27                 | 1.32 |
| (20:3)-LPE      | 1.19 | 0.27                 | 1.32 |
| (20:4)-LPE      | 0.80 | 0.19                 | 0.80 |
| (22:4)-LPE      | 1.12 | 0.29                 | 0.76 |
| (22:5)-LPE      | 0.30 | 0.43                 | 0.41 |
| (22:6)-LPE      | 0.98 | 0.27                 | 1.66 |

| WT HEK (A) WT HEK 2 (E) Average Standard Deviation |       |       |       | WT HEK (+) 200 ng/ml hGX (B) WT HEK (+) 200 ng/ml hGX (F) Average Standard Deviation |       |       |       | pre-pro-hGX overexpressed (C) pre-pro-hGX overexpressed (D) pre-pro-hGX overexpressed (G) Average Standard Deviation |       |       |       |       |      |
|----------------------------------------------------|-------|-------|-------|--------------------------------------------------------------------------------------|-------|-------|-------|----------------------------------------------------------------------------------------------------------------------|-------|-------|-------|-------|------|
| (12:0)-LPS                                         | 12.84 | 9.57  | 11.21 | 2.31                                                                                 | 16.77 | 16.88 | 16.73 | 0.08                                                                                                                 | 1.23  | 1.38  | 1.17  | 1.28  | 0.15 |
| (14:0)-LPS                                         | 6.48  | 6.84  | 7.56  | 1.53                                                                                 | 7.44  | 9.81  | 8.63  | 1.68                                                                                                                 | 1.59  | 2.13  | 2.27  | 2.25  | 0.17 |
| (16:0)-LPS                                         | 69.84 | 78.60 | 74.22 | 6.19                                                                                 | 82.40 | 96.45 | 94.43 | 2.86                                                                                                                 | 25.11 | 30.00 | 29.91 | 29.96 | 0.06 |
| (18:0)-LPS                                         | 16.00 | 16.77 | 17.39 | 0.87                                                                                 | 19.56 | 18.15 | 18.88 | 1.00                                                                                                                 | 5.22  | 6.16  | 5.28  | 5.73  | 0.64 |
| (18:2)-LPS                                         | 1.65  | 2.91  | 2.28  | 0.89                                                                                 | 2.76  | 2.22  | 2.49  | 0.38                                                                                                                 | 0.18  | 0.27  | 0.18  | 0.23  | 0.06 |
| (20:0)-LPS                                         | 6.86  | 6.84  | 7.56  | 1.53                                                                                 | 7.44  | 9.81  | 8.63  | 1.68                                                                                                                 | 1.59  | 2.13  | 2.27  | 2.25  | 0.17 |
| (20:1)-LPS                                         | 3.24  | 3.54  | 3.39  | 0.21                                                                                 | 4.80  | 2.46  | 3.63  | 1.65                                                                                                                 | 1.02  | 1.38  | 0.60  | 0.99  | 0.55 |
| (20:2)-LPS                                         | 0.48  | 0.75  | 0.58  | 0.38                                                                                 | 0.76  | 0.80  | 0.69  | 0.13                                                                                                                 | 0.76  | 0.80  | 0.84  | 0.84  | 0.17 |
| (20:3)-LPS                                         | 7.23  | 14.40 | 10.82 | 5.07                                                                                 | 9.87  | 11.16 | 10.52 | 0.91                                                                                                                 | 2.55  | 4.35  | 4.08  | 4.22  | 0.19 |
| (20:4)-LPS                                         | 1.68  | 2.73  | 2.21  | 0.74                                                                                 | 2.21  | 1.92  | 1.76  | 0.23                                                                                                                 | 1.02  | 0.72  | 0.99  | 0.86  | 0.15 |
| (22:4)-LPS                                         | 0.60  | 0.83  | 0.62  | 0.09                                                                                 | 0.08  | 0.69  | 0.69  | 0.00                                                                                                                 | 0.69  | 0.60  | 0.33  | 0.47  | 0.19 |
| (22:5)-LPS                                         | 0.60  | 0.63  | 0.62  | 0.02                                                                                 | 0.57  | 0.42  | 0.57  | 0.21                                                                                                                 | 0.38  | 0.00  | 0.21  | 0.11  | 0.19 |
| (22:6)-LPS                                         | 0.60  | 0.51  | 0.56  | 0.06                                                                                 | 0.45  | 0.45  | 0.45  | 0.00                                                                                                                 | 0.00  | 0.00  | 0.27  | 0.14  | 0.19 |

| Exogenous/WT SD |      | Overexpression/WT SD |      |
|-----------------|------|----------------------|------|
| (12:0)-LPS      | 1.49 | 0.31                 | 0.11 |
| (14:0)-LPS      | 0.99 | 0.06                 | 0.74 |
| (16:0)-LPS      | 1.27 | 0.11                 | 0.40 |
| (18:0)-LPS      | 1.08 | 0.08                 | 0.33 |
| (18:2)-LPS      | 1.09 | 0.46                 | 0.10 |
| (20:0)-LPS      | 2.37 | 0.32                 | 0.30 |
| (20:1)-LPS      | 0.97 | 0.49                 | 0.29 |
| (20:2)-LPS      | 0.92 | 0.50                 | 0.16 |
| (20:3)-LPS      | 1.07 | 0.46                 | 0.39 |
| (20:4)-LPS      | 0.80 | 0.29                 | 0.16 |
| (22:4)-LPS      | 0.15 | 0.49                 | 0.15 |
| (22:5)-LPS      | 0.93 | 0.35                 | 0.17 |
| (22:6)-LPS      | 0.81 | 0.09                 | 0.24 |

| WT HEK (A) WT HEK 2 (E) Average Standard Deviation |      |      |      | WT HEK (+) 200 ng/ml hGX (B) WT HEK (+) 200 ng/ml hGX (F) Average Standard Deviation |      |      |      | pre-pro-hGX overexpressed (C) pre-pro-hGX overexpressed (D) pre-pro-hGX overexpressed (G) Average Standard Deviation |      |      |      |      |      |
|----------------------------------------------------|------|------|------|--------------------------------------------------------------------------------------|------|------|------|----------------------------------------------------------------------------------------------------------------------|------|------|------|------|------|
| (12:0)-LPA                                         | 4.72 | 2.58 | 3.65 | 1.51                                                                                 | 2.54 | 4.41 | 3.47 | 1.32                                                                                                                 | 1.28 | 1.40 | 2.59 | 1.99 | 0.84 |
| (14:0)-LPA                                         | 4.00 | 4.21 | 4.10 | 0.15                                                                                 | 3.26 | 4.25 | 3.76 | 0.70                                                                                                                 | 0.00 | 1.14 | 1.21 | 1.17 | 0.05 |
| (16:0)-LPA                                         | 6.29 | 6.86 | 6.48 | 0.21                                                                                 | 3.15 | 6.38 | 4.75 | 2.27                                                                                                                 | 3.06 | 3.17 | 5.29 | 4.23 | 1.50 |
| (18:0)-LPA                                         |      |      |      |                                                                                      |      |      |      |                                                                                                                      |      |      |      |      |      |
| (18:1)-LPA                                         |      |      |      |                                                                                      |      |      |      |                                                                                                                      |      |      |      |      |      |
| (18:2)-LPA                                         |      |      |      |                                                                                      |      |      |      |                                                                                                                      |      |      |      |      |      |
| (20:0)-LPA                                         |      |      |      |                                                                                      |      |      |      |                                                                                                                      |      |      |      |      |      |
| (20:1)-LPA                                         |      |      |      |                                                                                      |      |      |      |                                                                                                                      |      |      |      |      |      |
| (20:2)-LPA                                         |      |      |      |                                                                                      |      |      |      |                                                                                                                      |      |      |      |      |      |
| (20:3)-LPA                                         |      |      |      |                                                                                      |      |      |      |                                                                                                                      |      |      |      |      |      |
| (20:4)-LPA                                         |      |      |      |                                                                                      |      |      |      |                                                                                                                      |      |      |      |      |      |
| (22:4)-LPA                                         |      |      |      |                                                                                      |      |      |      |                                                                                                                      |      |      |      |      |      |
| (22:5)-LPA                                         |      |      |      |                                                                                      |      |      |      |                                                                                                                      |      |      |      |      |      |
| (22:6)-LPA                                         |      |      |      |                                                                                      |      |      |      |                                                                                                                      |      |      |      |      |      |

| Exogenous/WT SD |      | Overexpression/WT SD |      |
|-----------------|------|----------------------|------|
| (12:0)-LPA      | 0.95 | 0.54                 | 0.55 |
| (14:0)-LPA      | 0.92 | 0.17                 | 0.29 |
| (16:0)-LPA      | 0.73 | 0.35                 | 0.65 |
| (18:0)-LPA      |      |                      |      |
| (18:1)-LPA      |      |                      |      |
| (18:2)-LPA      |      |                      |      |
| (20:0)-LPA      |      |                      |      |
| (20:1)-LPA      |      |                      |      |
| (20:2)-LPA      |      |                      |      |
| (20:3)-LPA      |      |                      |      |
| (20:4)-LPA      |      |                      |      |
| (22:4)-LPA      |      |                      |      |
| (22:5)-LPA      |      |                      | </   |

|                |       |       |       |      |       |       |       |      |       |       |       |       |      |                |      |      |      |      |
|----------------|-------|-------|-------|------|-------|-------|-------|------|-------|-------|-------|-------|------|----------------|------|------|------|------|
| (18:2)-PIaLPC  | 3.20  | 3.55  | 3.36  | 0.25 | 6.08  | 4.30  | 5.19  | 1.26 | 3.50  | 4.05  | 3.00  | 3.53  | 0.74 | (18:2)-PIaLPC  | 1.54 | 0.39 | 1.04 | 0.23 |
| (18:0)-LvsPAPF | 40.37 | 37.56 | 38.96 | 1.99 | 45.23 | 44.10 | 44.66 | 0.80 | 7.72  | 8.93  | 7.36  | 8.15  | 1.11 | (18:0)-LvsPAPF | 1.15 | 0.06 | 0.21 | 0.03 |
| (18:0)-LvsPAPF | 23.81 | 25.61 | 24.71 | 1.27 | 32.69 | 34.79 | 33.74 | 1.48 | 19.85 | 21.06 | 22.12 | 21.60 | 0.73 | (18:0)-LvsPAPF | 1.37 | 0.09 | 0.87 | 0.05 |
| (18:1)-LvsPAPF | 14.83 | 14.56 | 14.68 | 0.19 | 17.87 | 15.55 | 16.71 | 1.64 | 5.90  | 6.50  | 5.74  | 6.12  | 0.54 | (18:1)-LvsPAPF | 1.14 | 0.11 | 0.42 | 0.04 |



**Supplemental Material Fig. 1.** Standard curves for commercially available lysophospholipids. The Y-axis gives the area of the peak in the selected ion trace chromatogram (arbitrary units) and the X-axis gives the total pmole analytes injected (based on calibration of lysophospholipid stock solutions using inorganic phosphorous analysis) (note each analyte is present in the stock solution in equi-molar concentration).

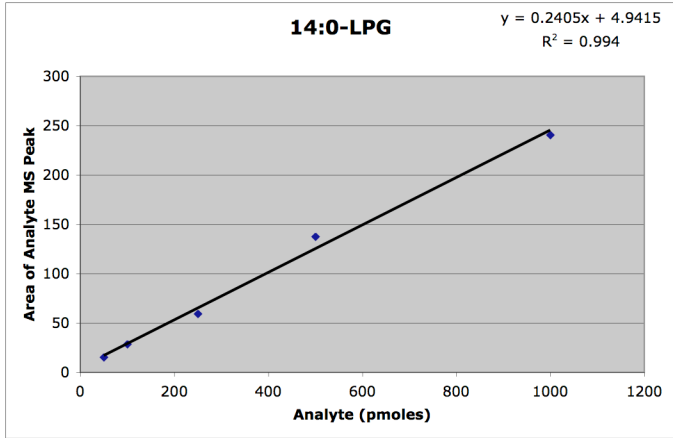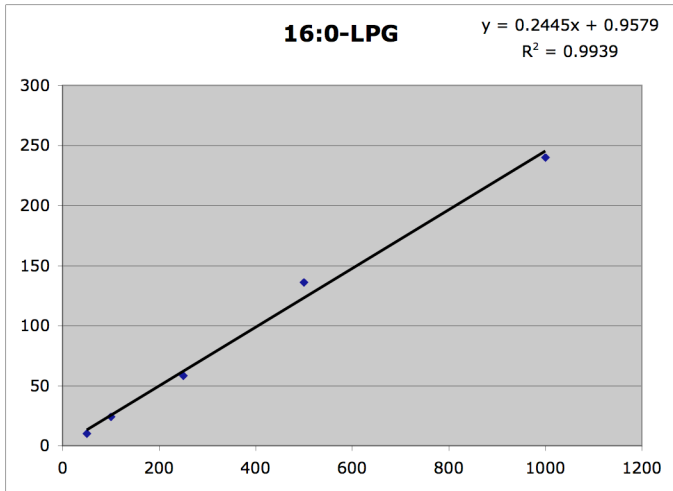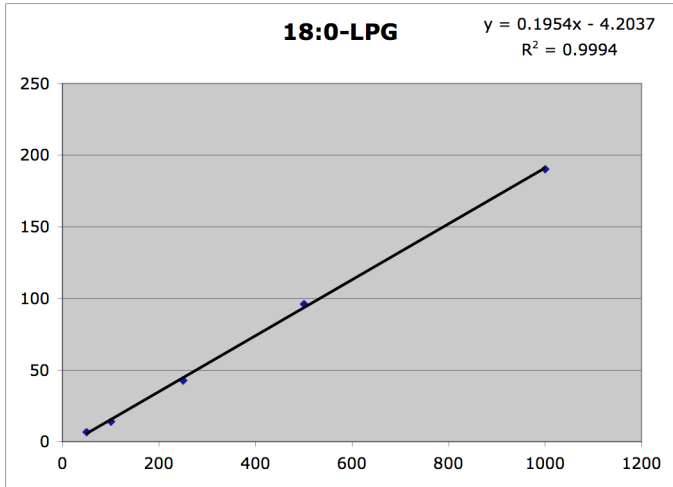

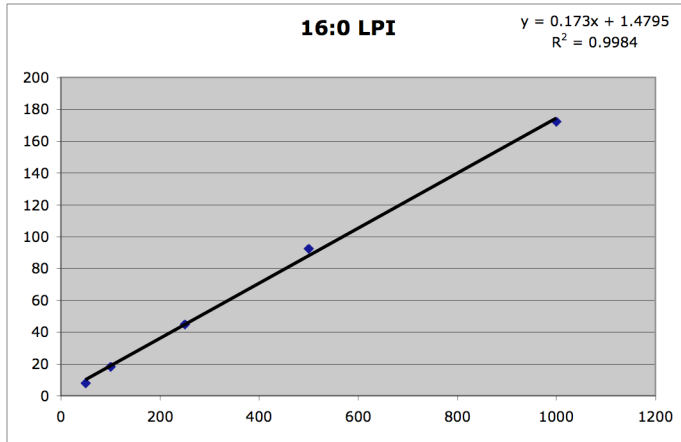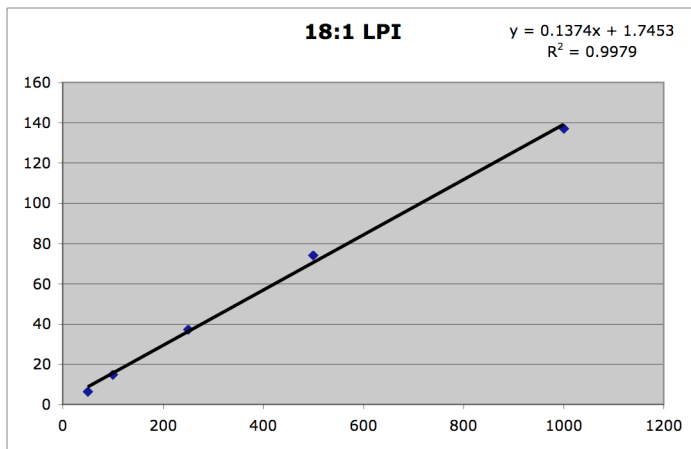

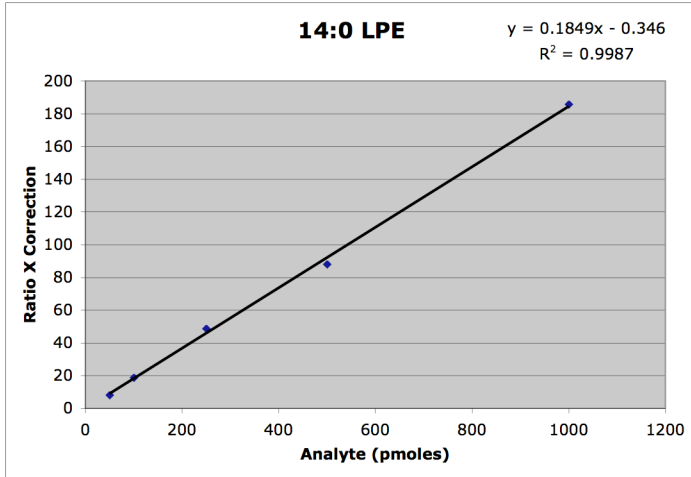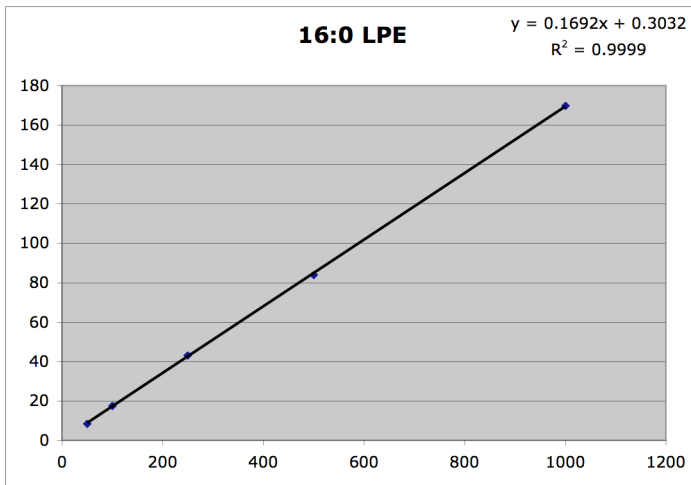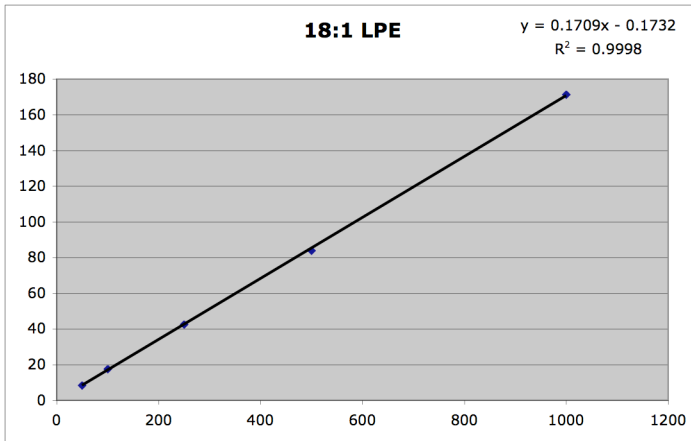

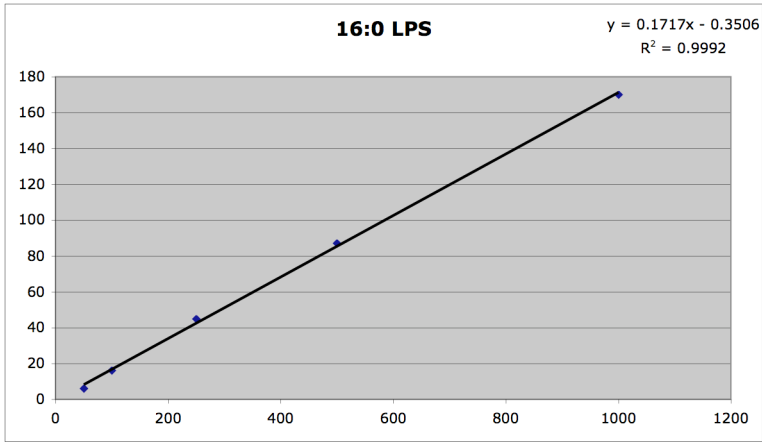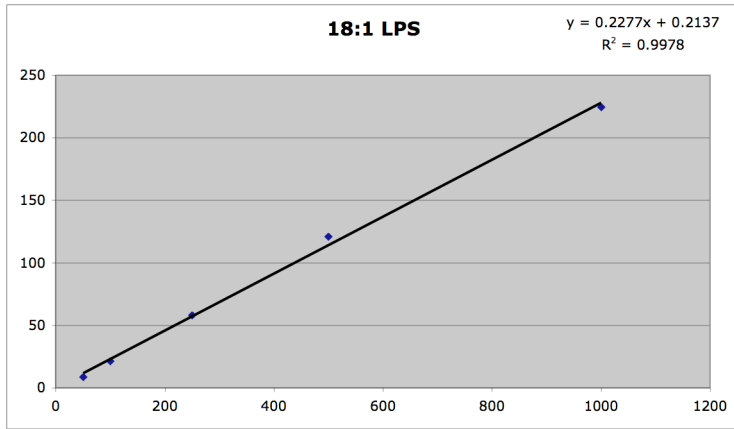

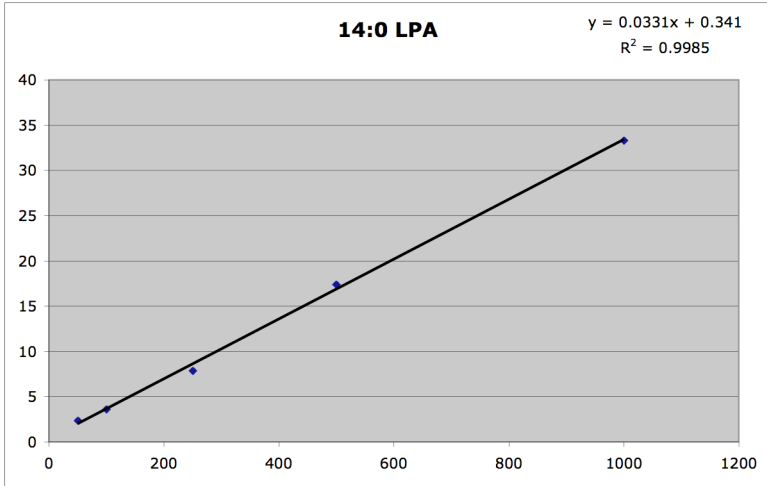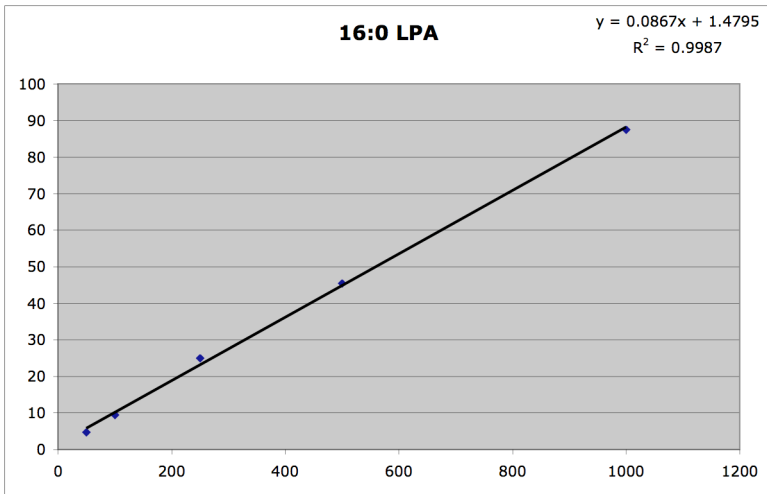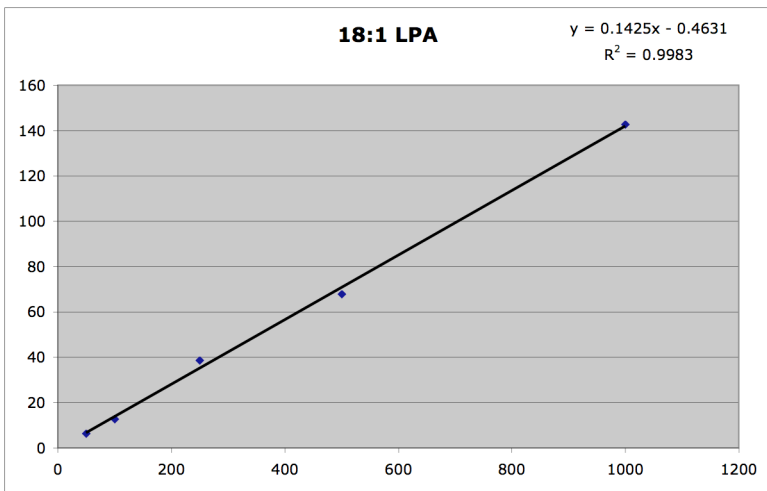

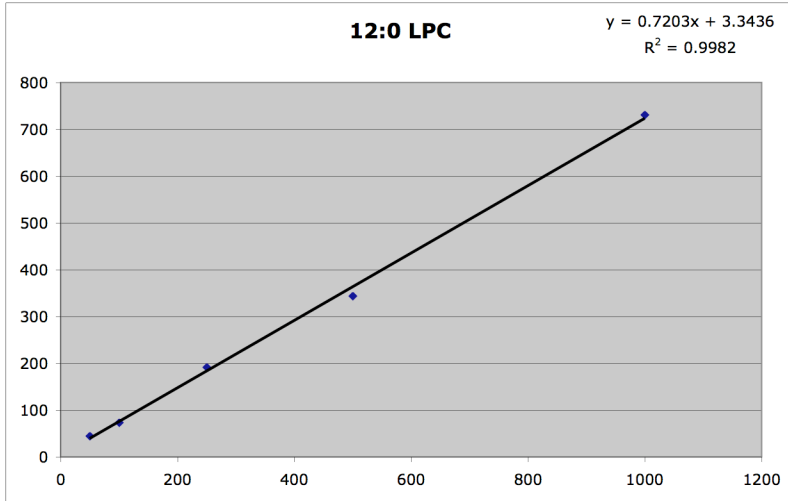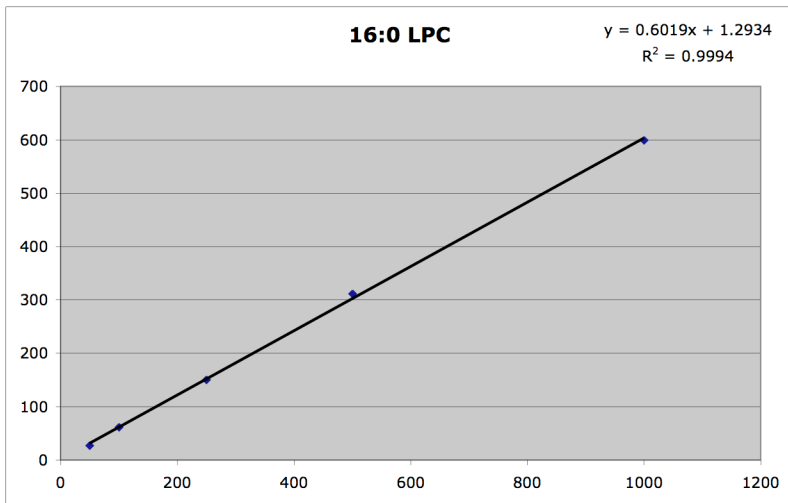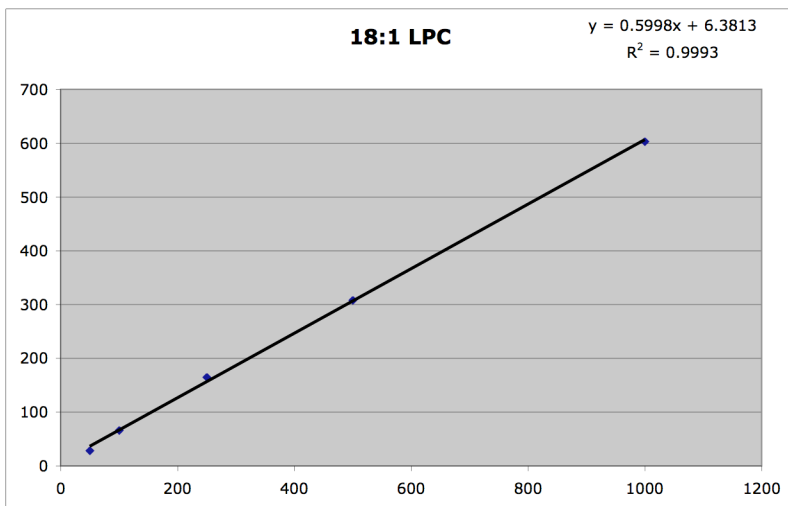

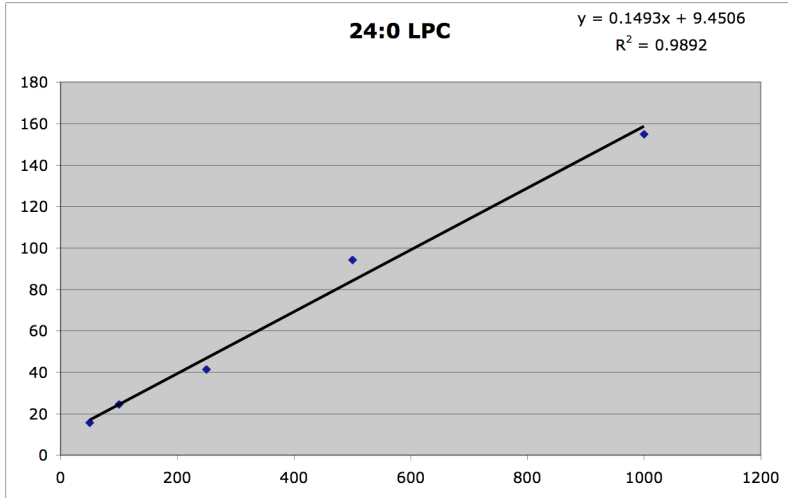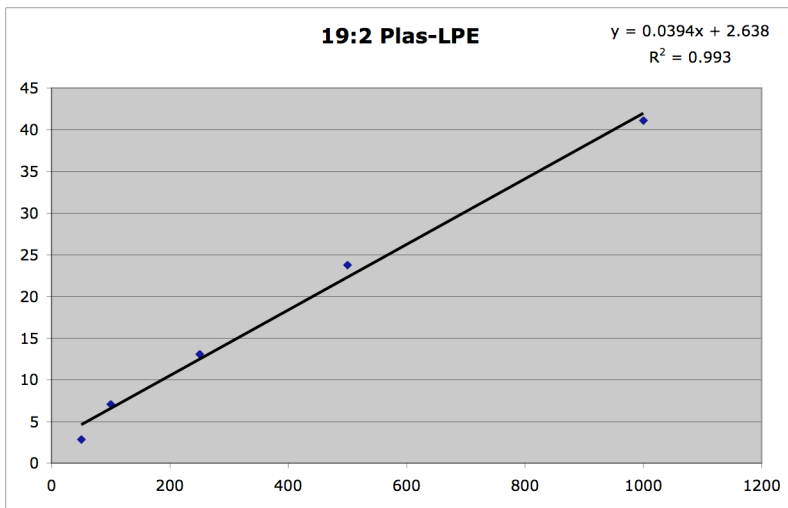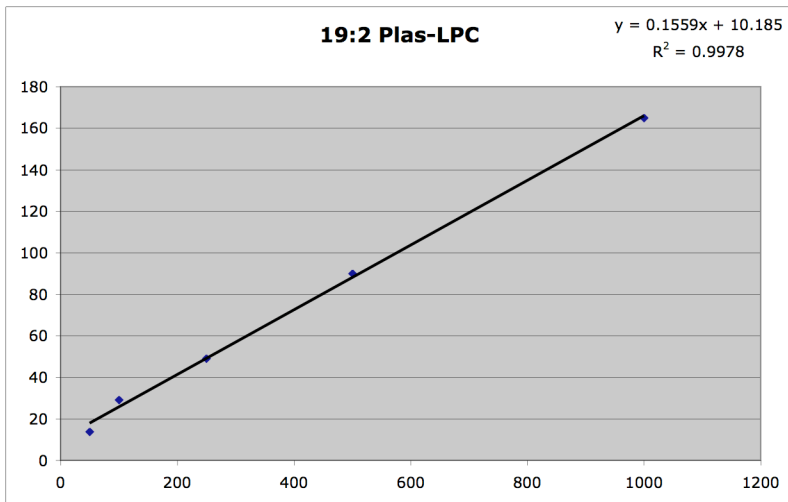



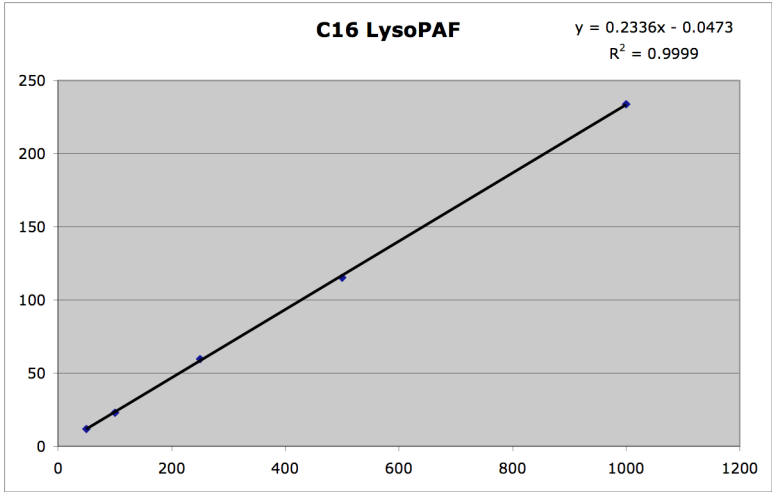

**Supplemental Material Fig. 2.** LC/ESI-MSMS detection of a standard mixture of lysophospholipids. The top panel shows positive mode detection of 24:0-LPC (1.5 pmole), 18:0-LPC (0.2 pmole), 16:0-LPC (0.4 pmole), 12:0-LPC (0.3 pmole), and 16:0-alkyl-LPC (1.0 pmole). The bottom panel shows negative mode detection of 18:0-LPE (3.8 pmole), 18:1-LPE (0.8 pmole), 16:0-LPE (2.2 pmole), 14:0-LPE (5.8 pmole), and 18:2-enyl-LPE (2.1 pmole). The X-axis is the LC retention time (min), and the Y-axis is the intensity of the ion trace peaks normalized to the largest peak.

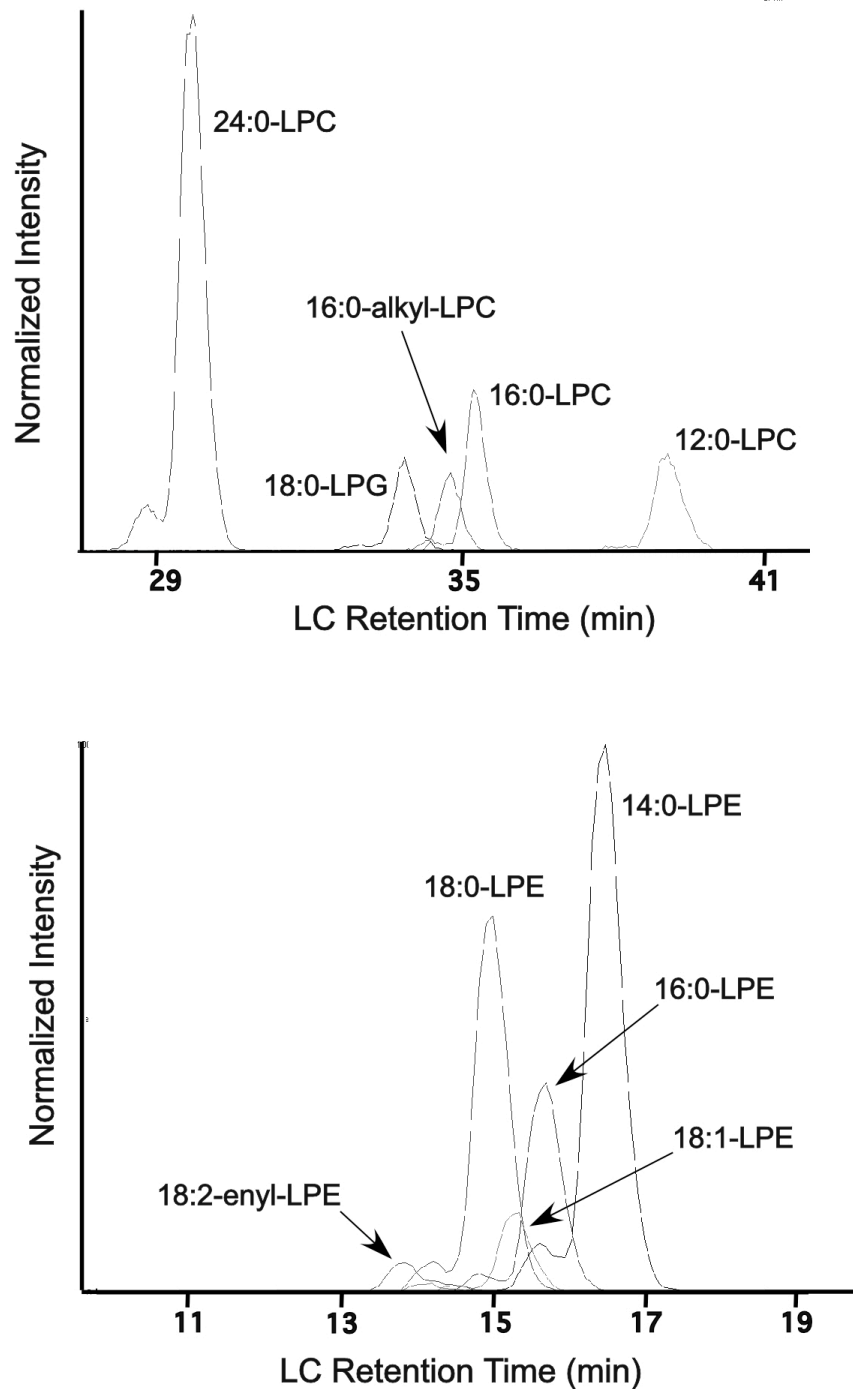

**Supplemental Material Fig. 3.** LC/ESI-MSMS detection of quantities of lysophospholipids near the limit of quantification.

**10 fmoles 16:1 LPC**

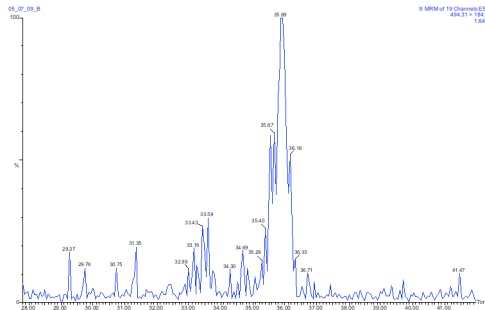

**200 fmoles 16:0 LPG**

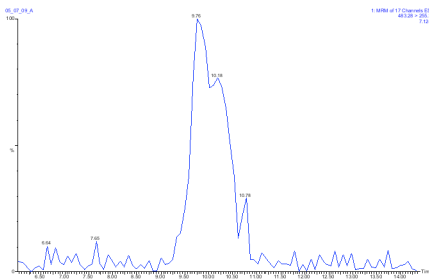

**100 fmoles 18:1 LPI**

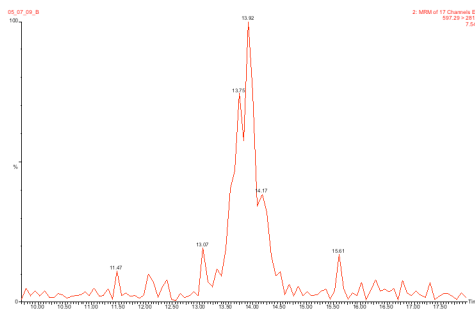

Supplemental Material Fig. 3 continued

75 fmoles 16:0 LPE

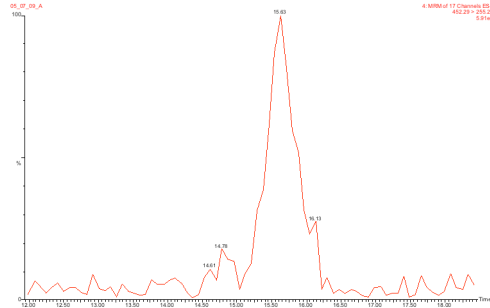

LPA 1 pmole

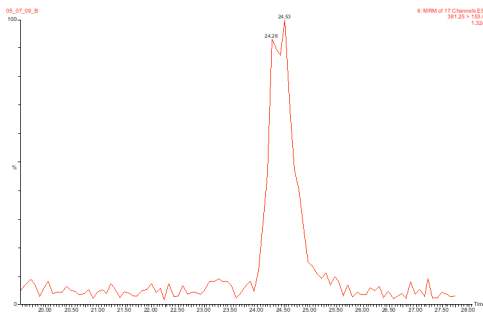

150 fmoles 18:0 LPS

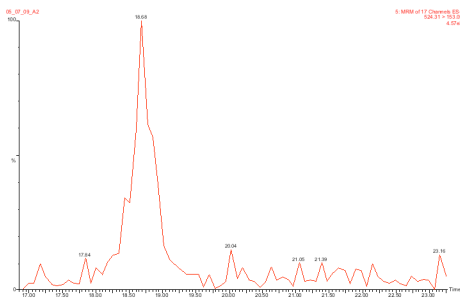

**Supplemental Material Figure 4. Distribution of coefficient of variances for the analysis of lysophospholipids in mouse serum.** For each of the 80 lysophospholipid species listed in Supplemental Material Table \*\*\*, we calculated the coefficient of variance among the 4 runs ( $100 \times (\text{standard deviation}/\text{mean})$ ). The coefficient of variances are displayed along the X-axis. It can be seen that most of the values are < 20%.

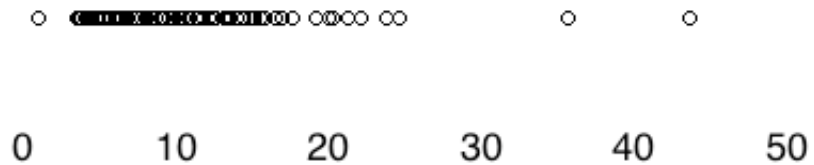

Supplement: supp_D000885_jlr.D000885-1.pdf [file supp_D000885_jlr.D000885-1.pdf]
